# Supplementary material for: La libertad de trabajo y la interdicción del trabajo forzoso
Source: Royal Society of Chemistry journal article supplement (doi:10.1039/c7ob00723j), 2011-01-01
Supplement: c7ob00723j1.pdf [file c7ob00723j1.pdf]

# Supporting Information

## Zinc-Mediated $\alpha$ -Regioselective Barbier-Type Cinnamylation

### Reaction of Aldehydes, Ketones and Esters

Li-Ming Zhao,\* Hua-Shuai Gao, De-Feng Li, Jing Dong, Lan-Lin Sang, and Jie Ji

*School of Chemistry and Chemical Engineering, and Jiangsu Key Laboratory of Green Synthetic Chemistry for Functional Materials, Jiangsu Normal University, Xuzhou 221116, Jiangsu, China*

[lmzhao@jsnu.edu.cn](mailto:lmzhao@jsnu.edu.cn)

## Table of Contents

|                                                                                           |         |
|-------------------------------------------------------------------------------------------|---------|
| 1. Copies of $^1\text{H}$ and $^{13}\text{C}$ NMR Spectra for Compounds <b>2a-v</b> ..... | S2-S23  |
| 2. Copies of $^1\text{H}$ and $^{13}\text{C}$ NMR Spectra for Compounds <b>5a-e</b> ..... | S24-S28 |
| 3. Copies of $^1\text{H}$ and $^{13}\text{C}$ NMR Spectra for Compound <b>7</b> .....     | S29     |

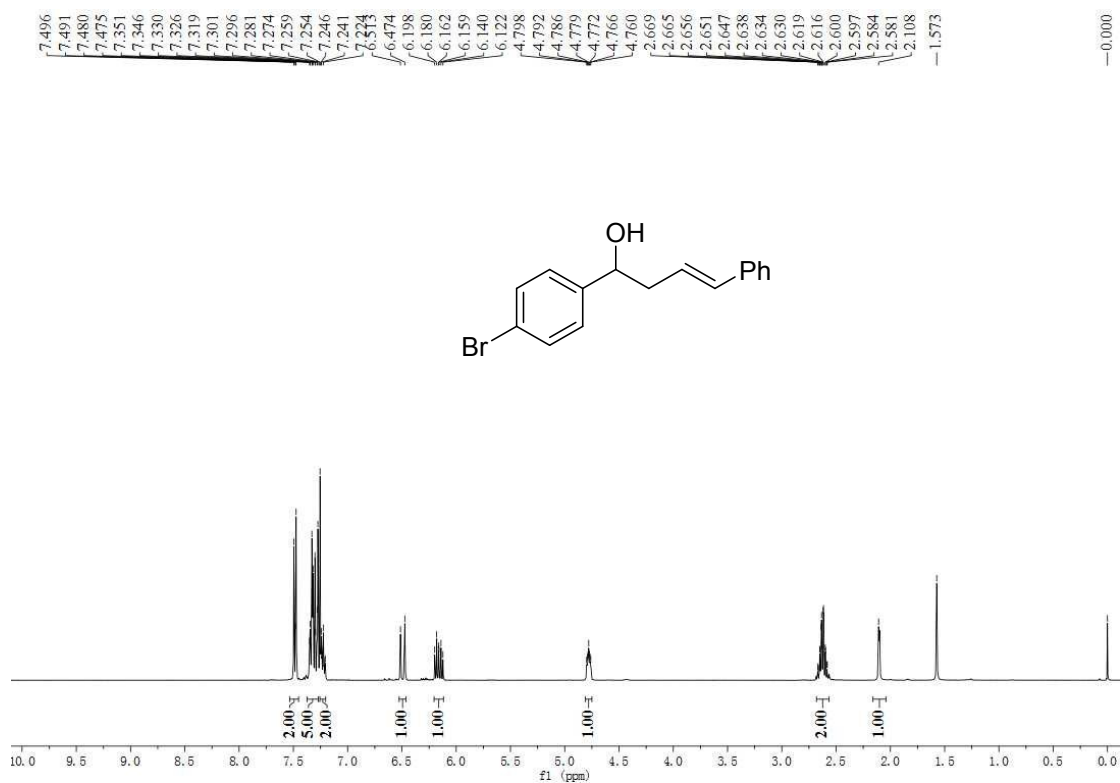

**<sup>1</sup>H NMR Spectrum (400 MHz, CDCl<sub>3</sub>) of Compound 2a**

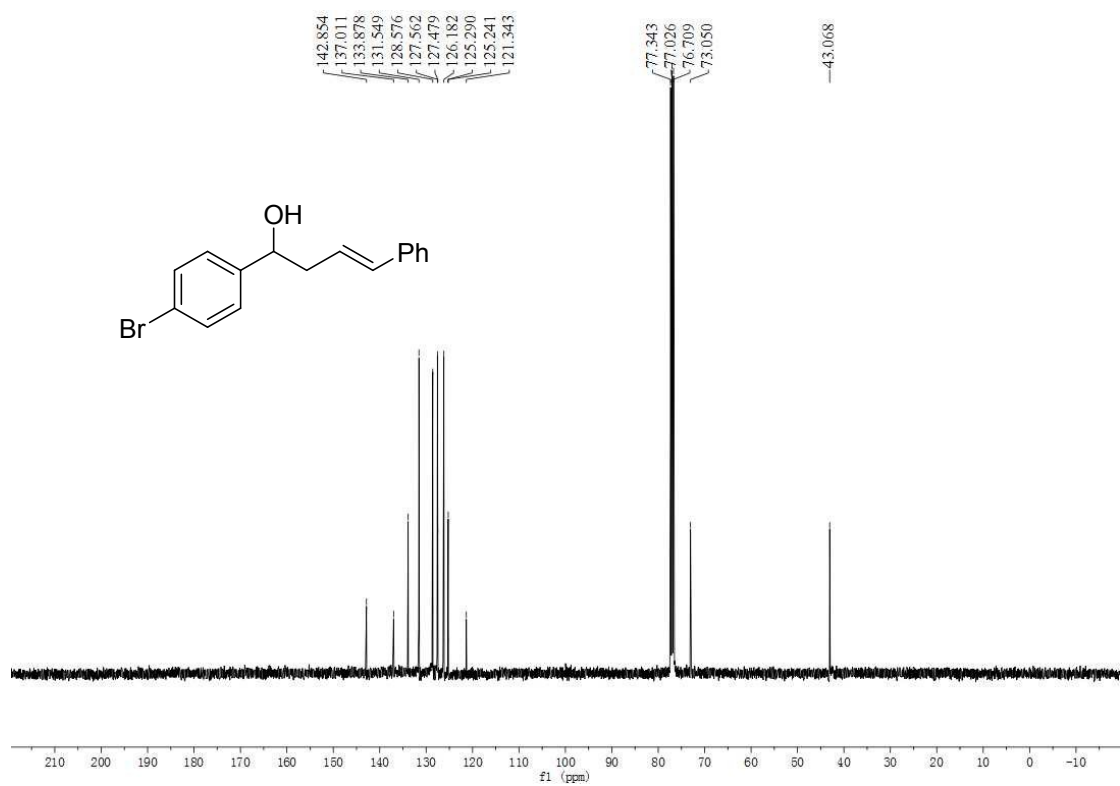

**<sup>13</sup>C NMR Spectrum (100 MHz, CDCl<sub>3</sub>) of Compound 2a**

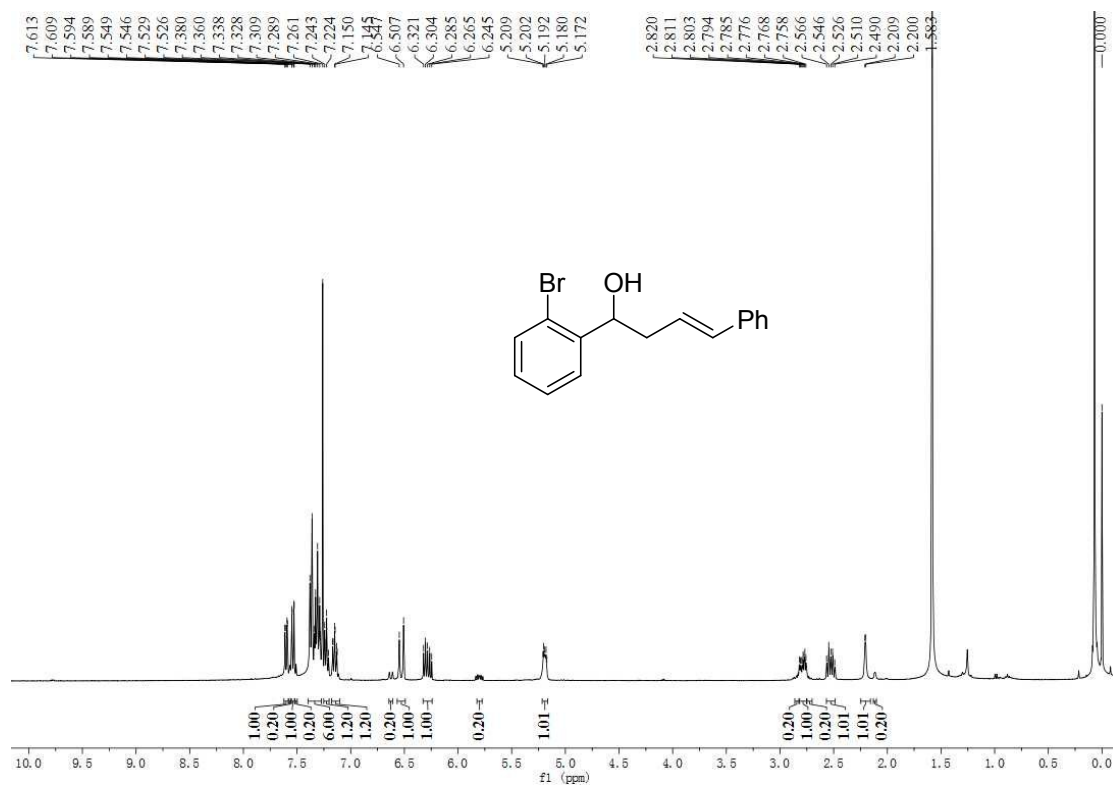

<sup>1</sup>H NMR Spectrum (400 MHz, CDCl<sub>3</sub>) of Compound 2b

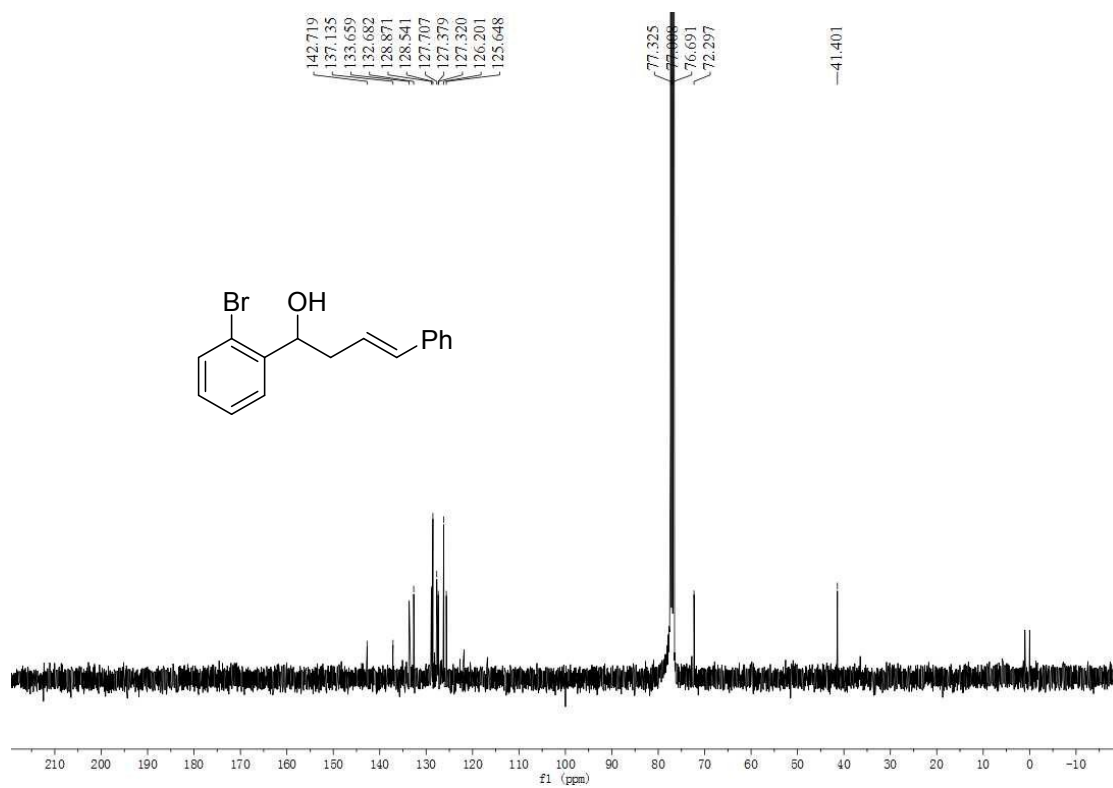

<sup>13</sup>C NMR Spectrum (100 MHz, CDCl<sub>3</sub>) of Compound 2b

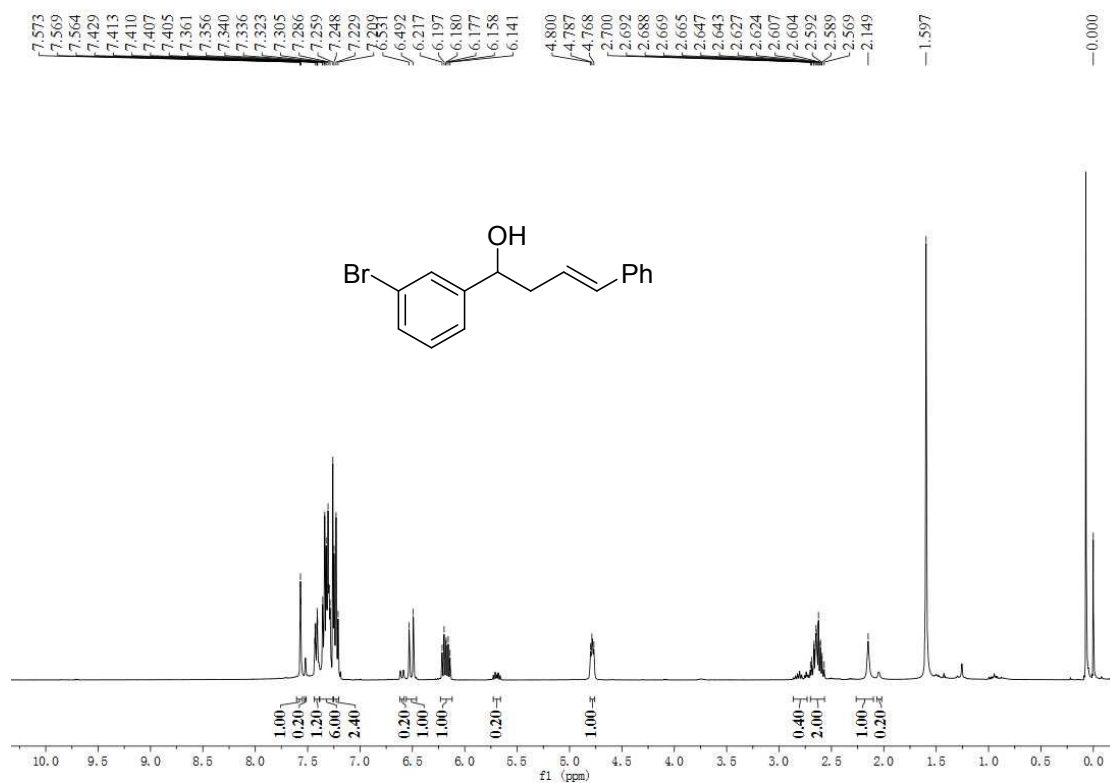

<sup>1</sup>H NMR Spectrum (400 MHz, CDCl<sub>3</sub>) of Compound 2c

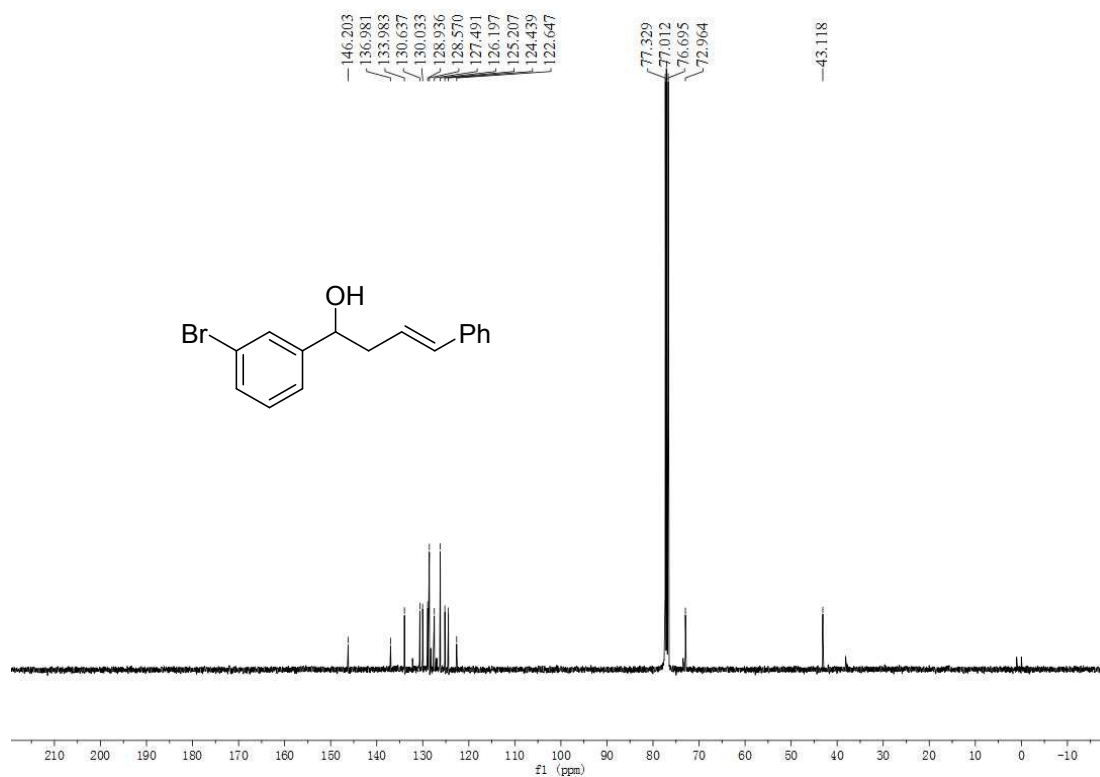

<sup>13</sup>C NMR Spectrum (100 MHz, CDCl<sub>3</sub>) of Compound 2c

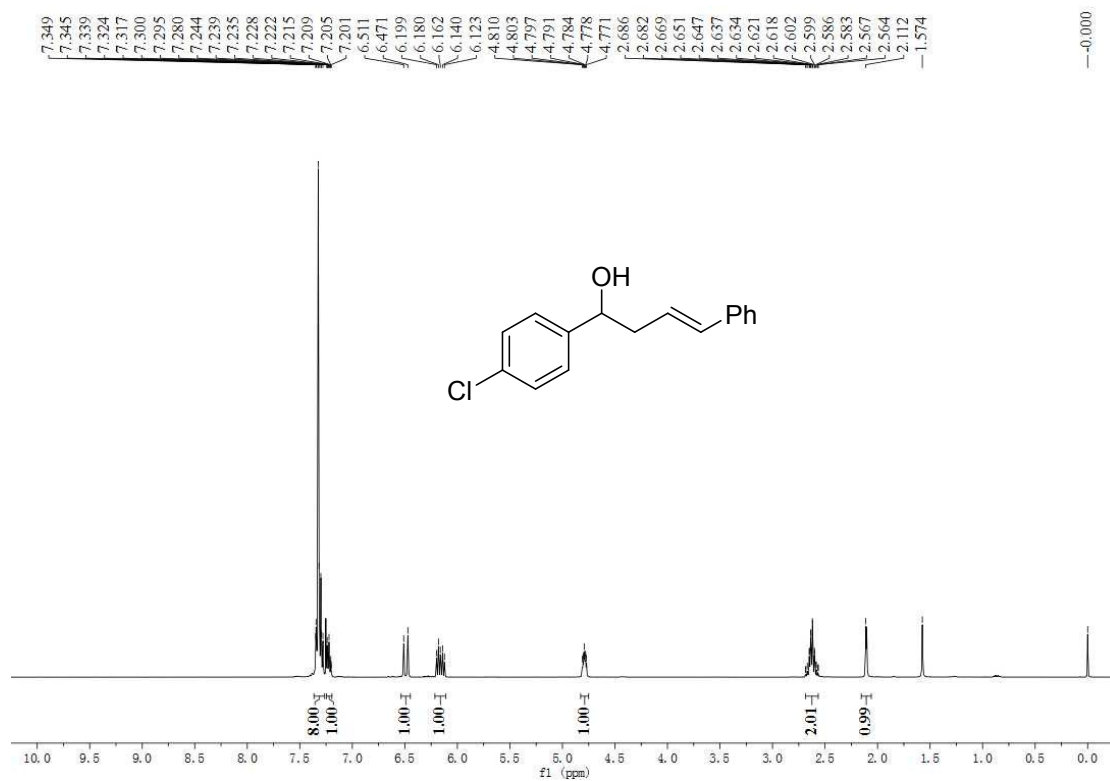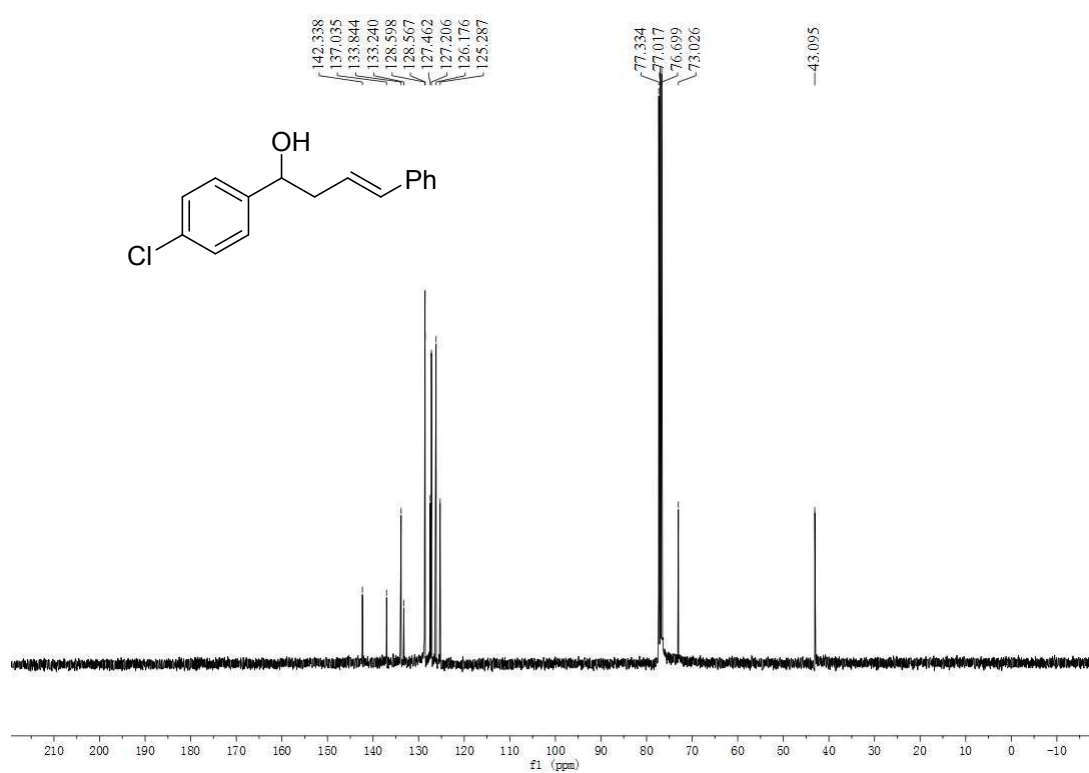

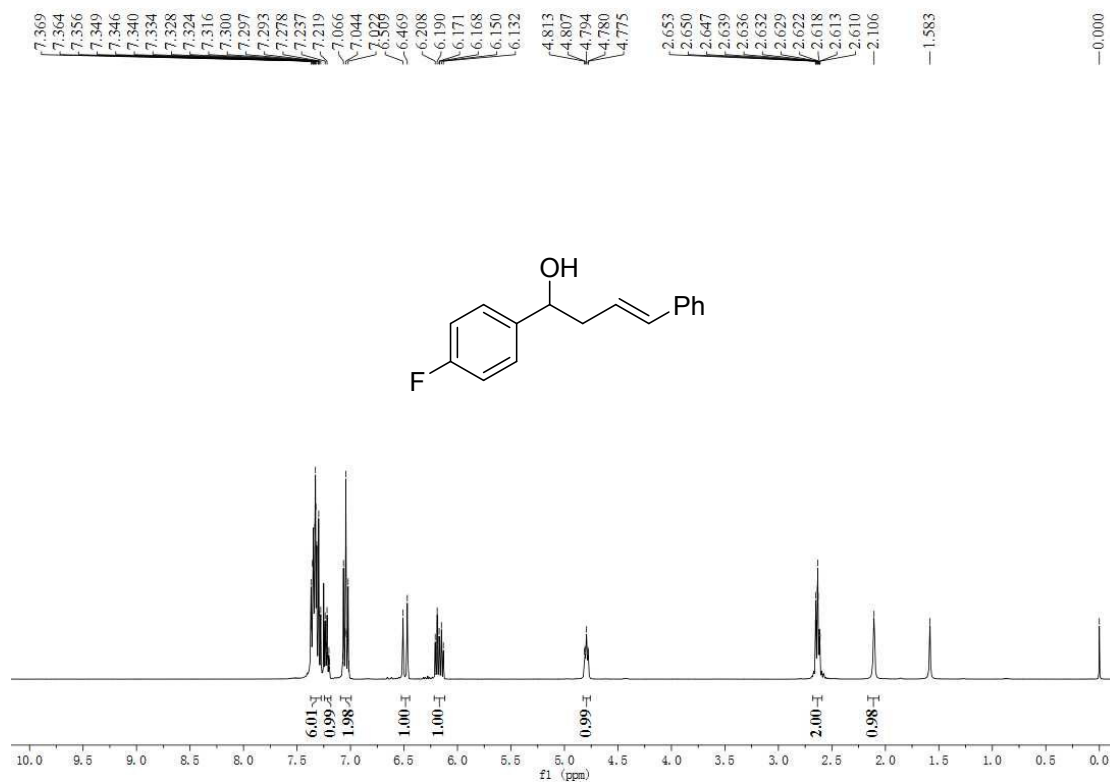

**<sup>1</sup>H NMR Spectrum (400 MHz, CDCl<sub>3</sub>) of Compound 2e**

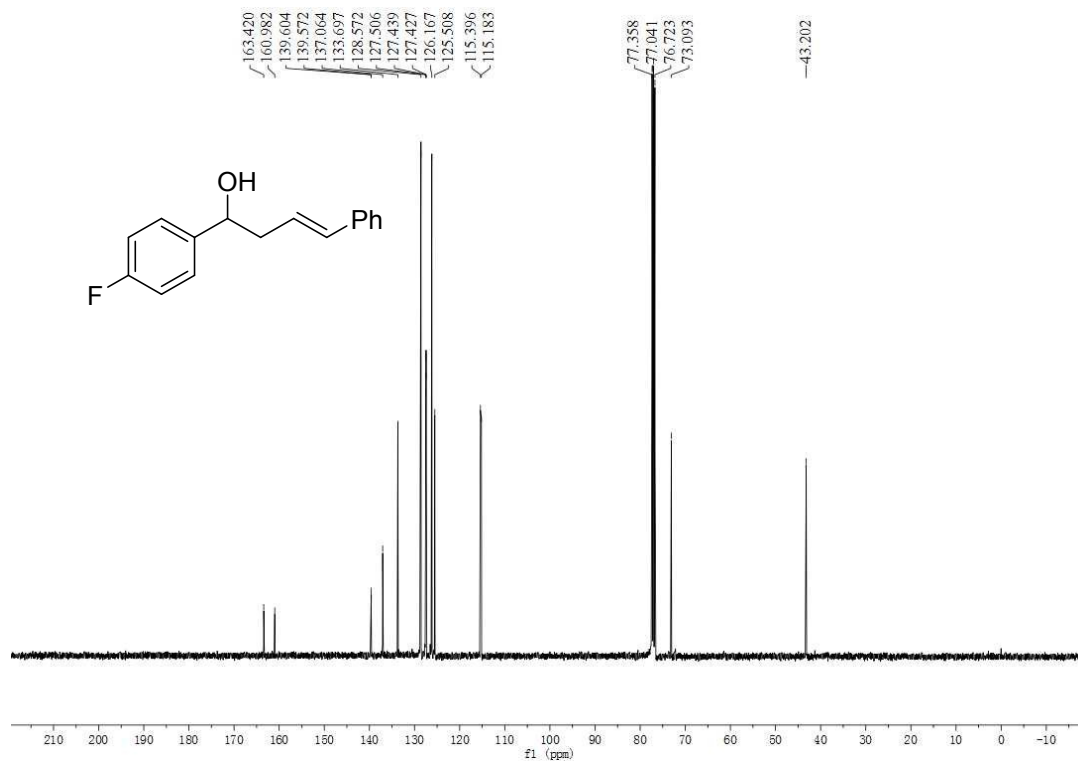

**<sup>13</sup>C NMR Spectrum (100 MHz, CDCl<sub>3</sub>) of Compound 2e**

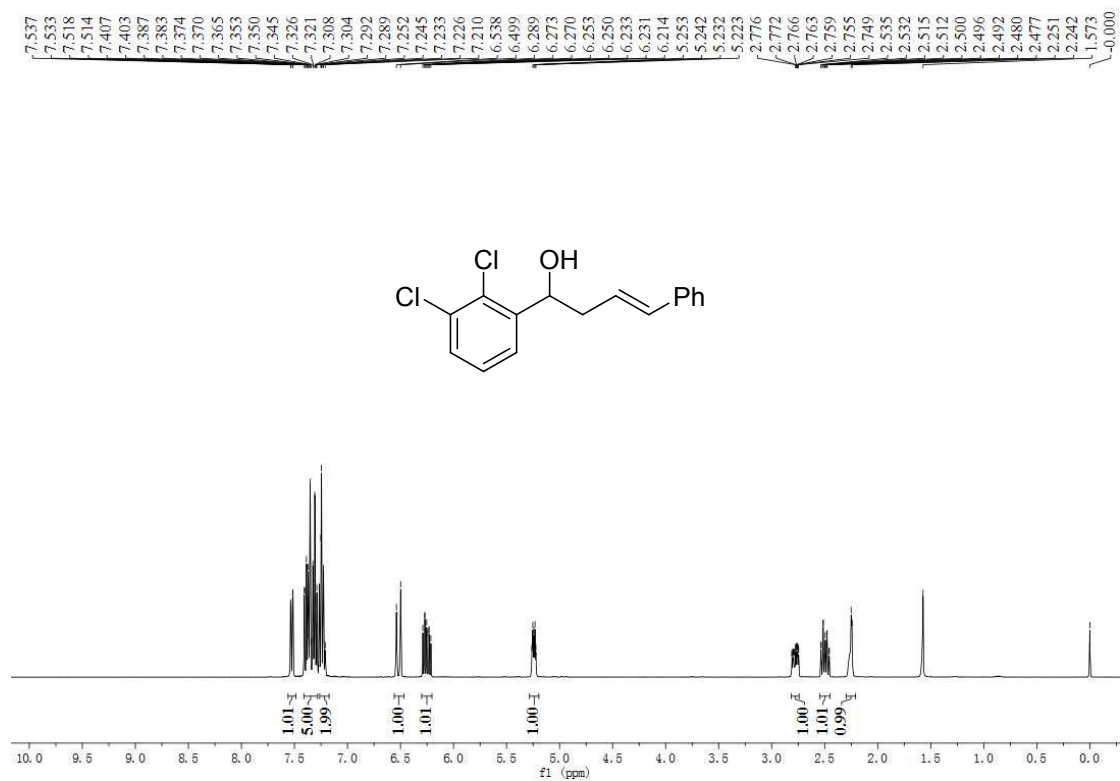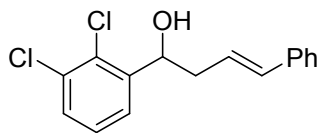

<sup>1</sup>H NMR Spectrum (400 MHz, CDCl<sub>3</sub>) of Compound 2f

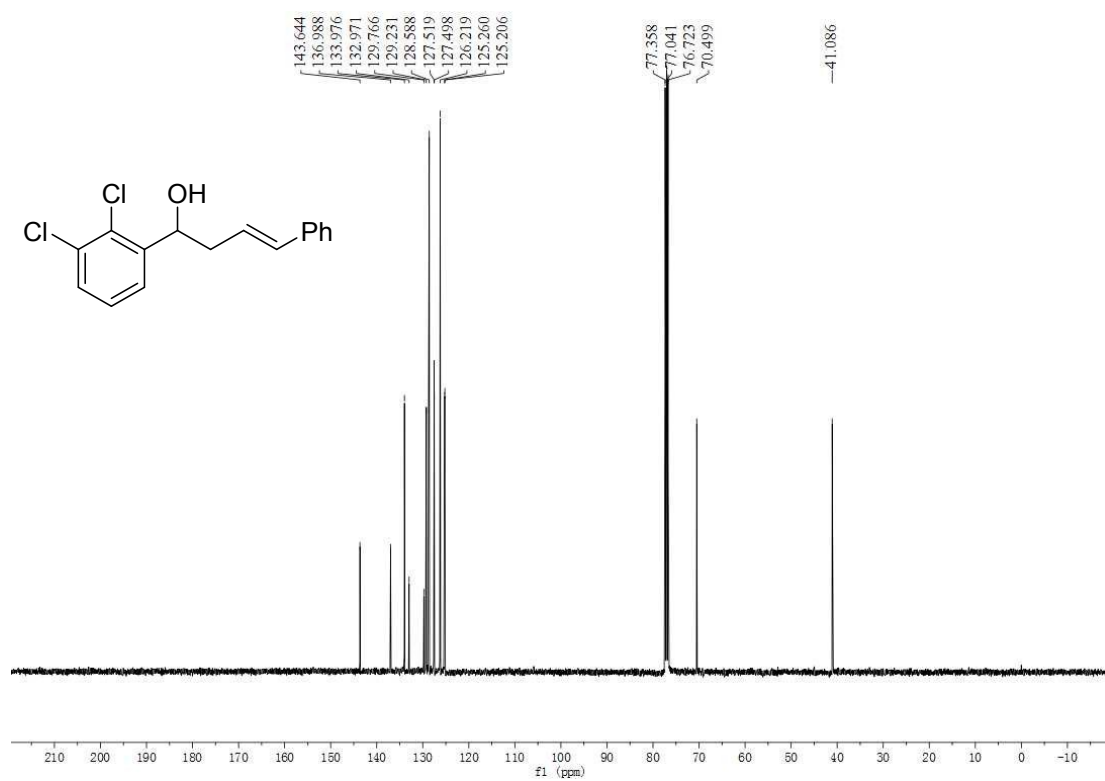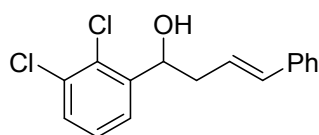

<sup>13</sup>C NMR Spectrum (100 MHz, CDCl<sub>3</sub>) of Compound 2f

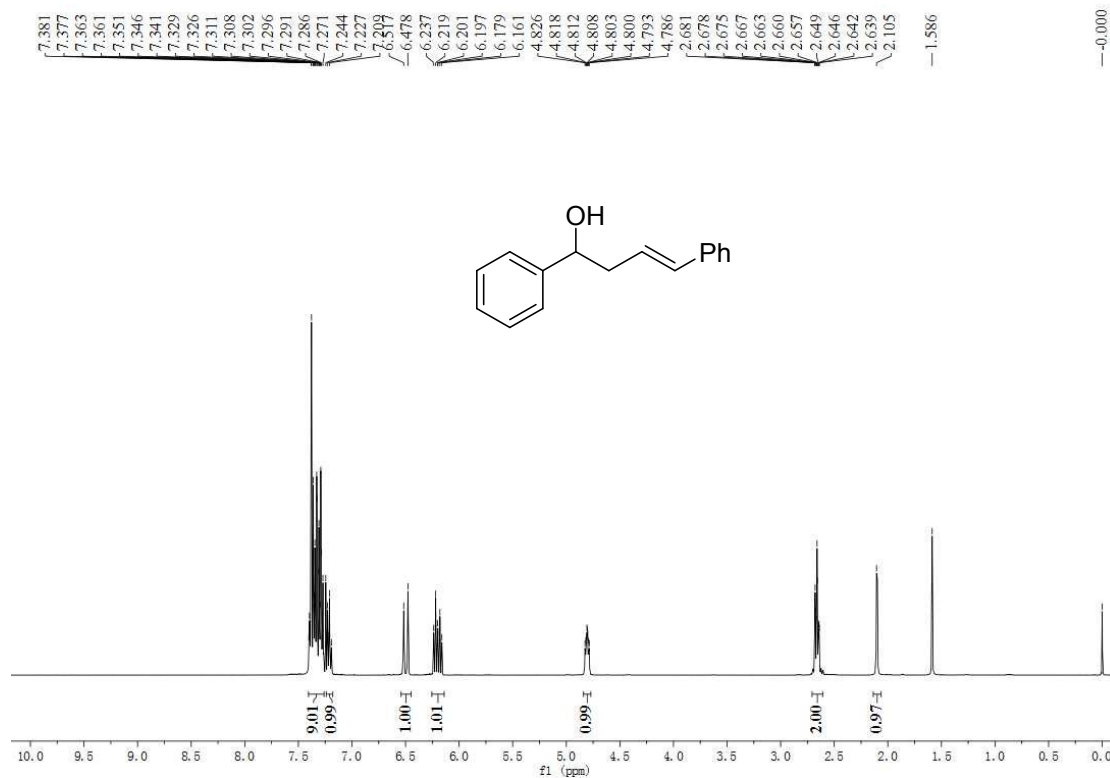

**<sup>1</sup>H NMR Spectrum (400 MHz, CDCl<sub>3</sub>) of Compound **2g****

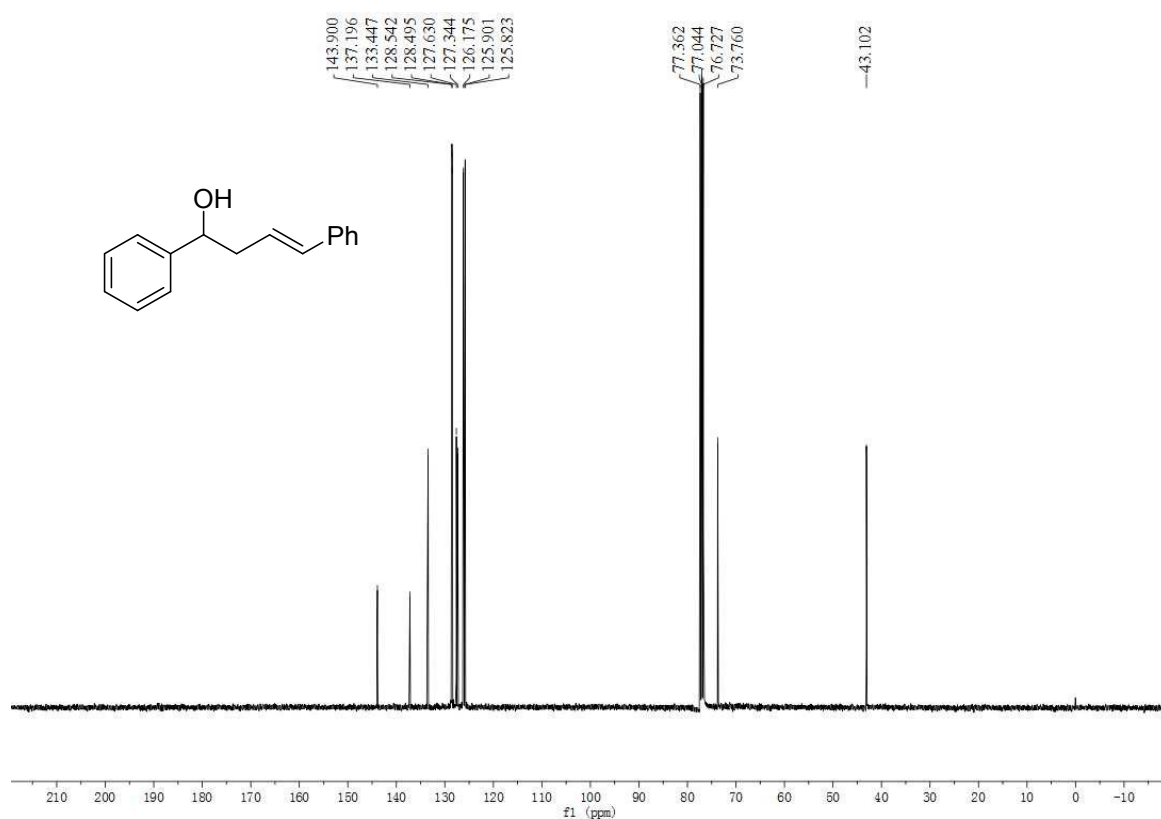

**<sup>13</sup>C NMR Spectrum (100 MHz, CDCl<sub>3</sub>) of Compound **2g****



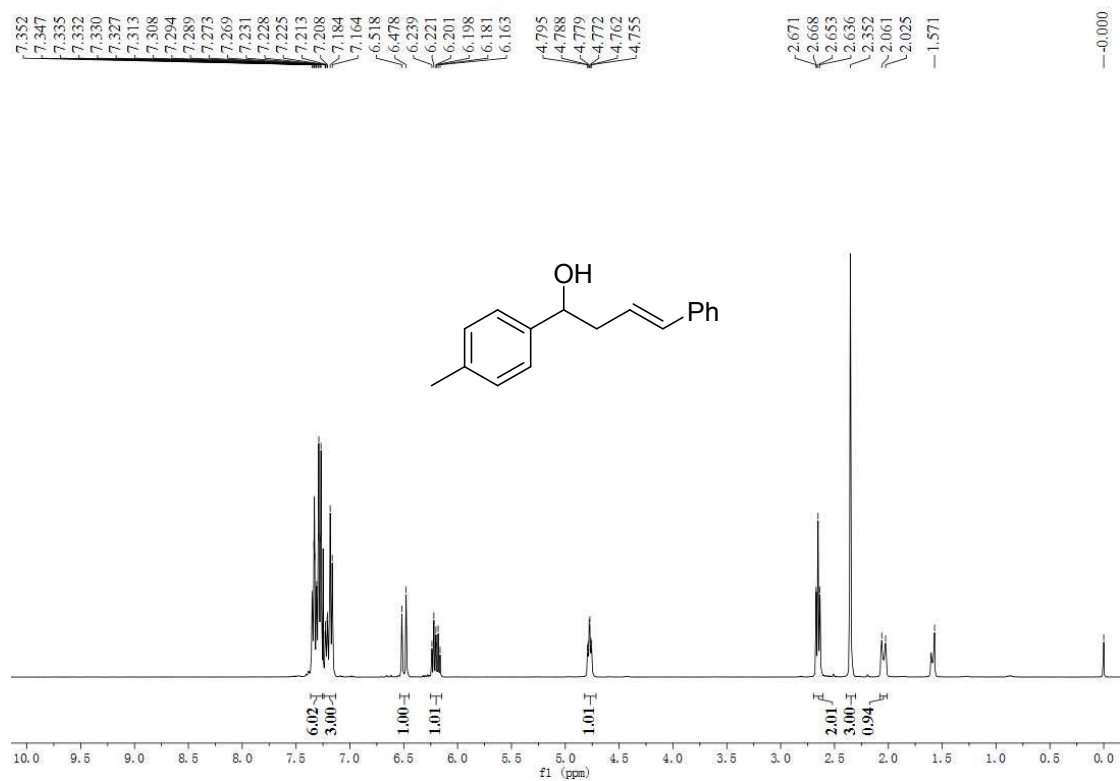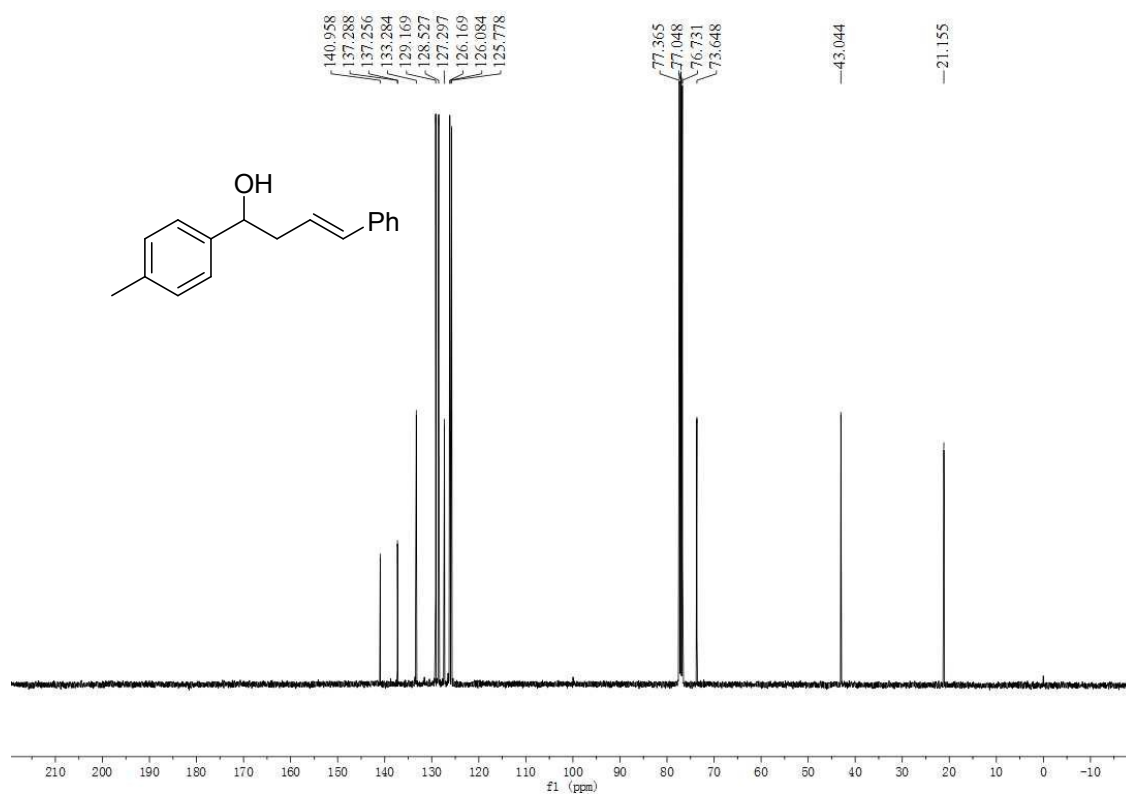

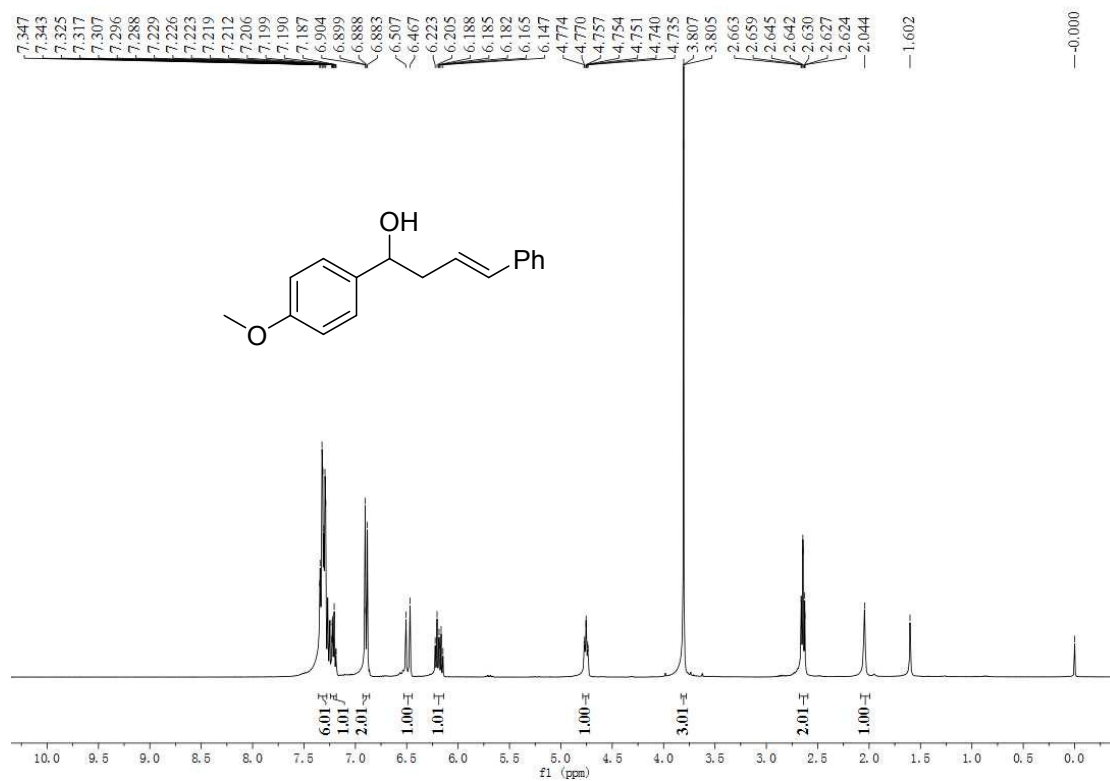

<sup>1</sup>H NMR Spectrum (400 MHz, CDCl<sub>3</sub>) of Compound 2i

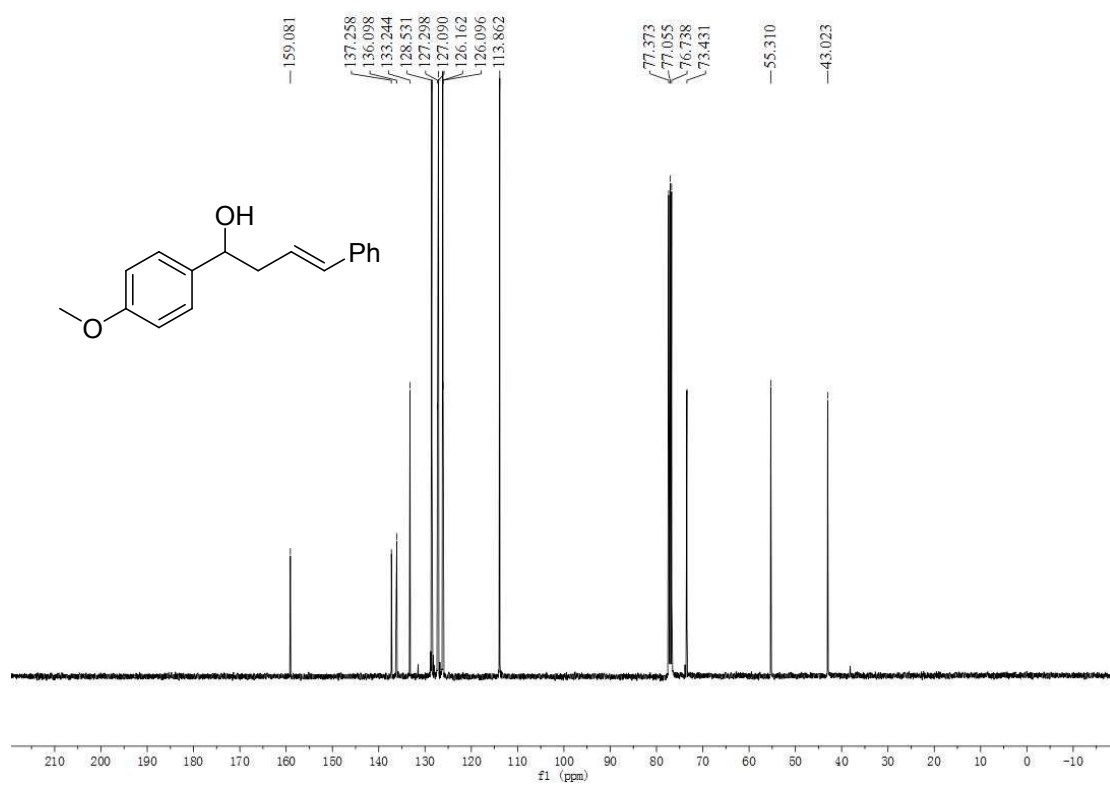

<sup>13</sup>C NMR Spectrum (100 MHz, CDCl<sub>3</sub>) of Compound 2i

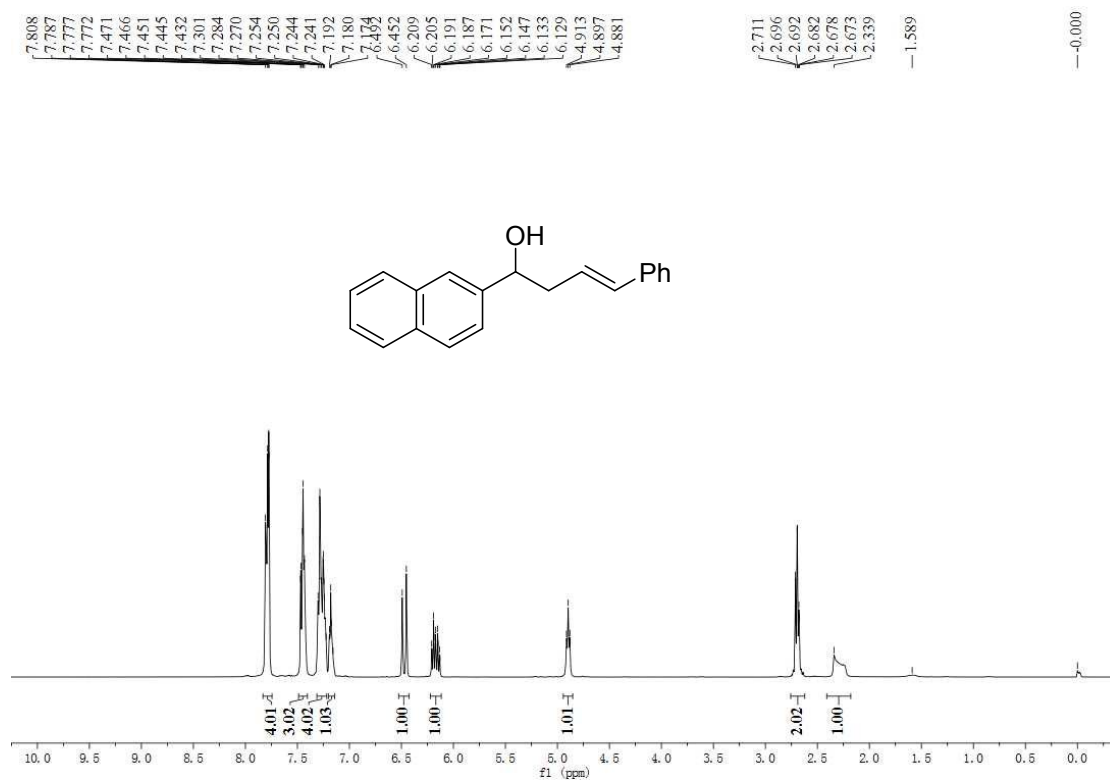

<sup>1</sup>H NMR Spectrum (400 MHz, CDCl<sub>3</sub>) of Compound 2j

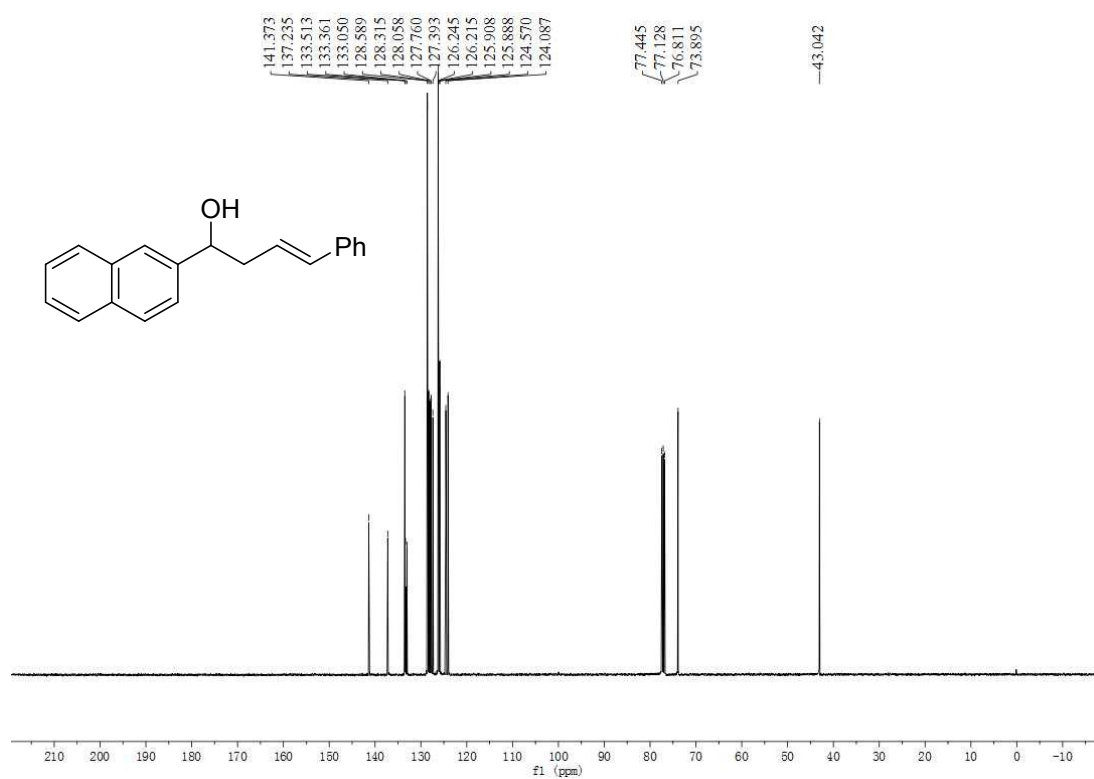

<sup>13</sup>C NMR Spectrum (100 MHz, CDCl<sub>3</sub>) of Compound 2j

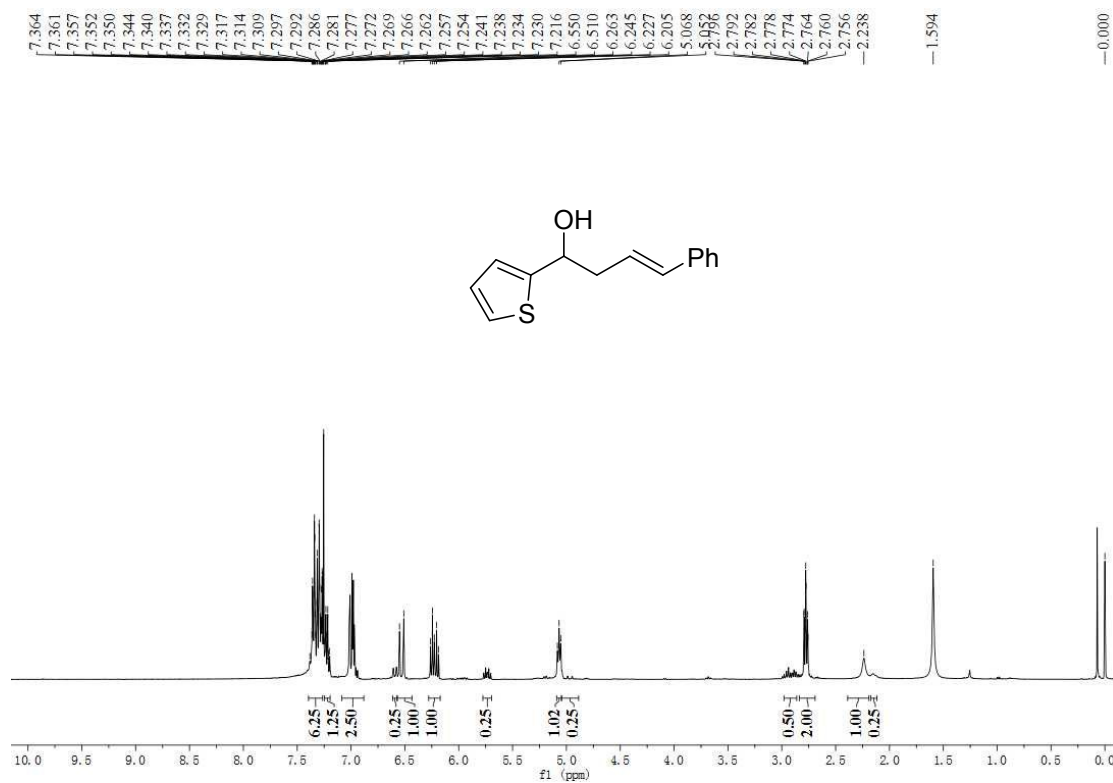

**<sup>1</sup>H NMR Spectrum (400 MHz, CDCl<sub>3</sub>) of Compound 2k**

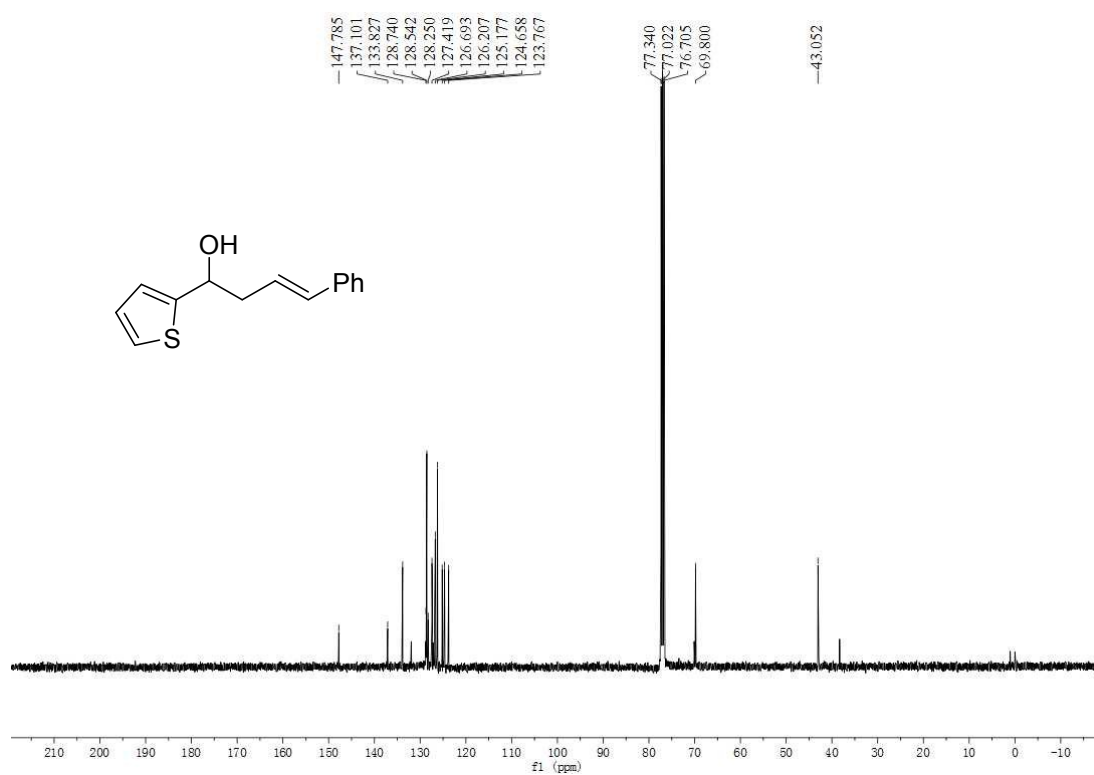

**<sup>13</sup>C NMR Spectrum (100 MHz, CDCl<sub>3</sub>) of Compound 2k**

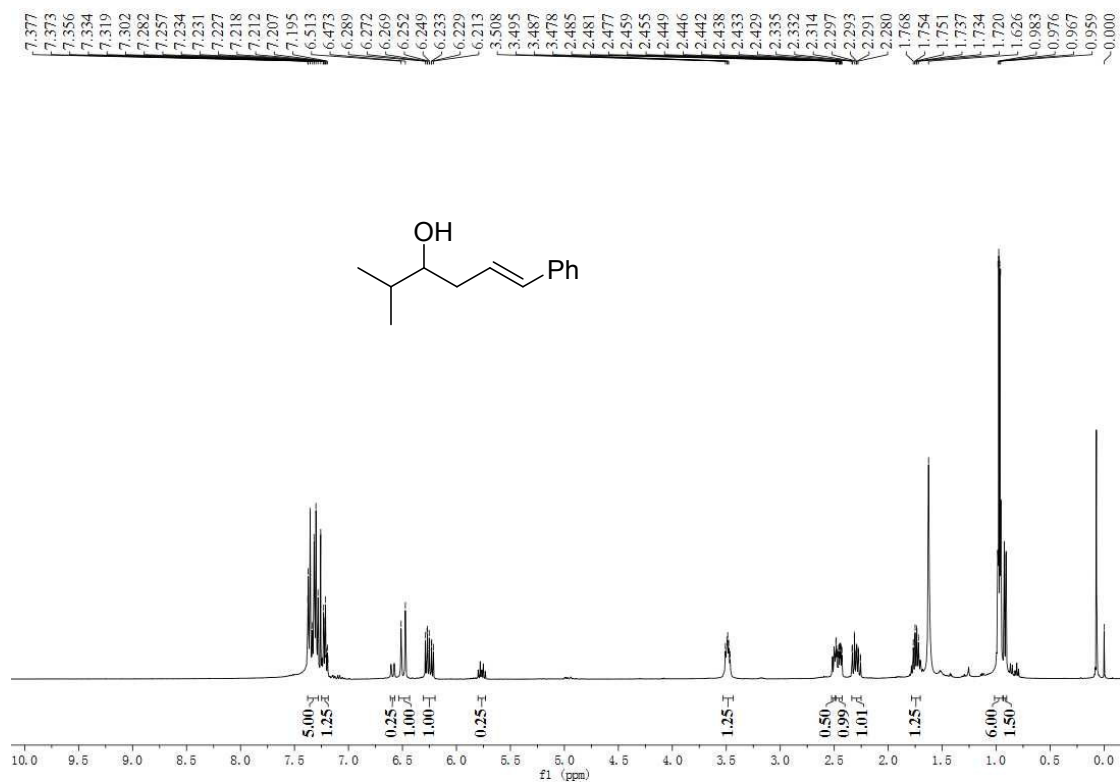

<sup>1</sup>H NMR Spectrum (400 MHz, CDCl<sub>3</sub>) of Compound 2I

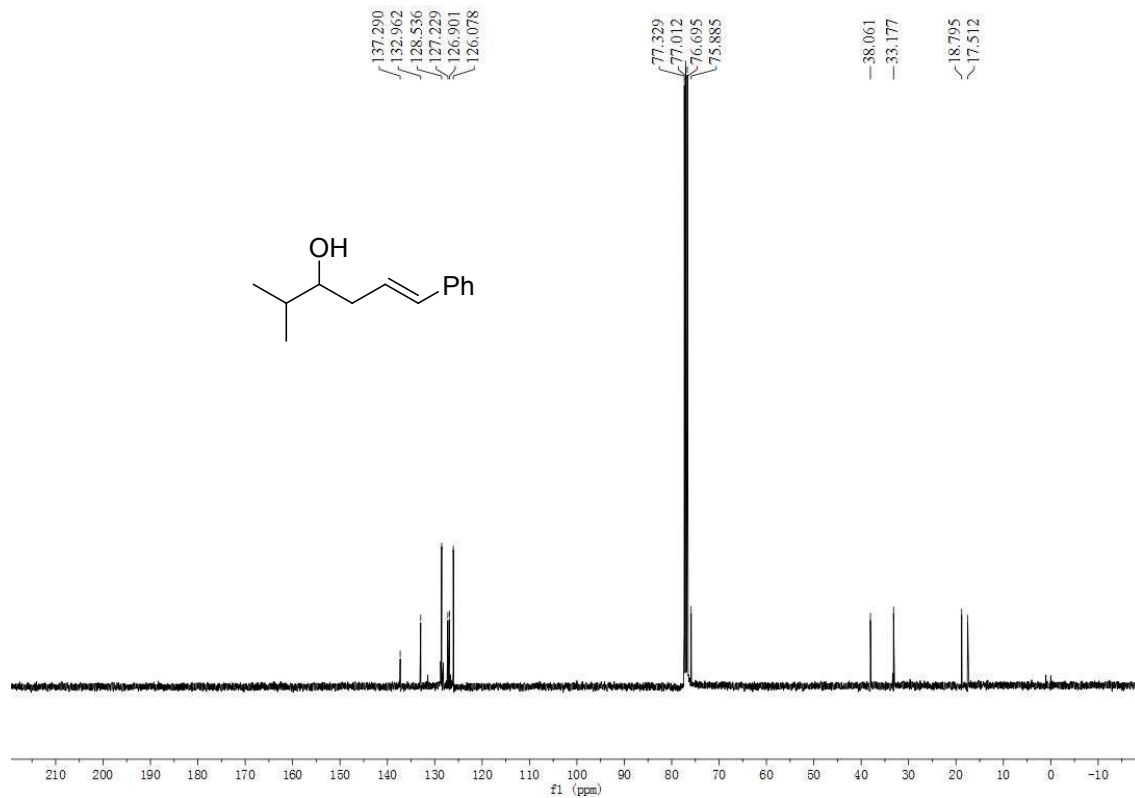

<sup>13</sup>C NMR Spectrum (100 MHz, CDCl<sub>3</sub>) of Compound 2I

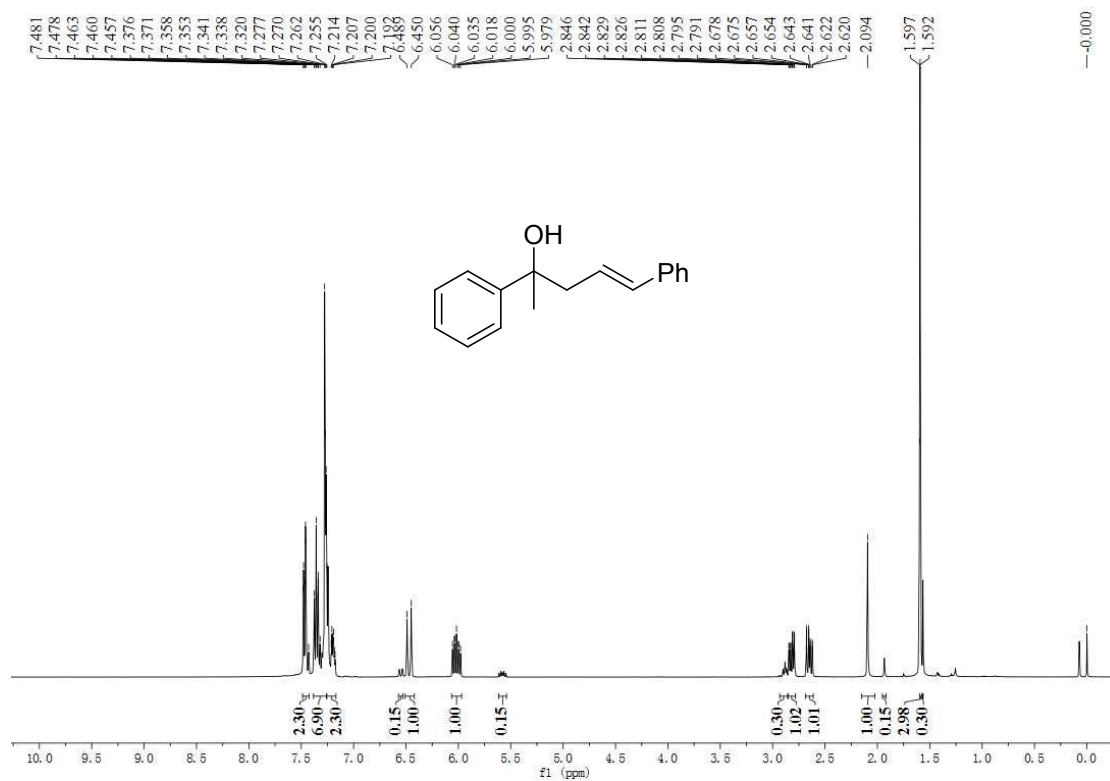

<sup>1</sup>H NMR Spectrum (400 MHz, CDCl<sub>3</sub>) of Compound 2m

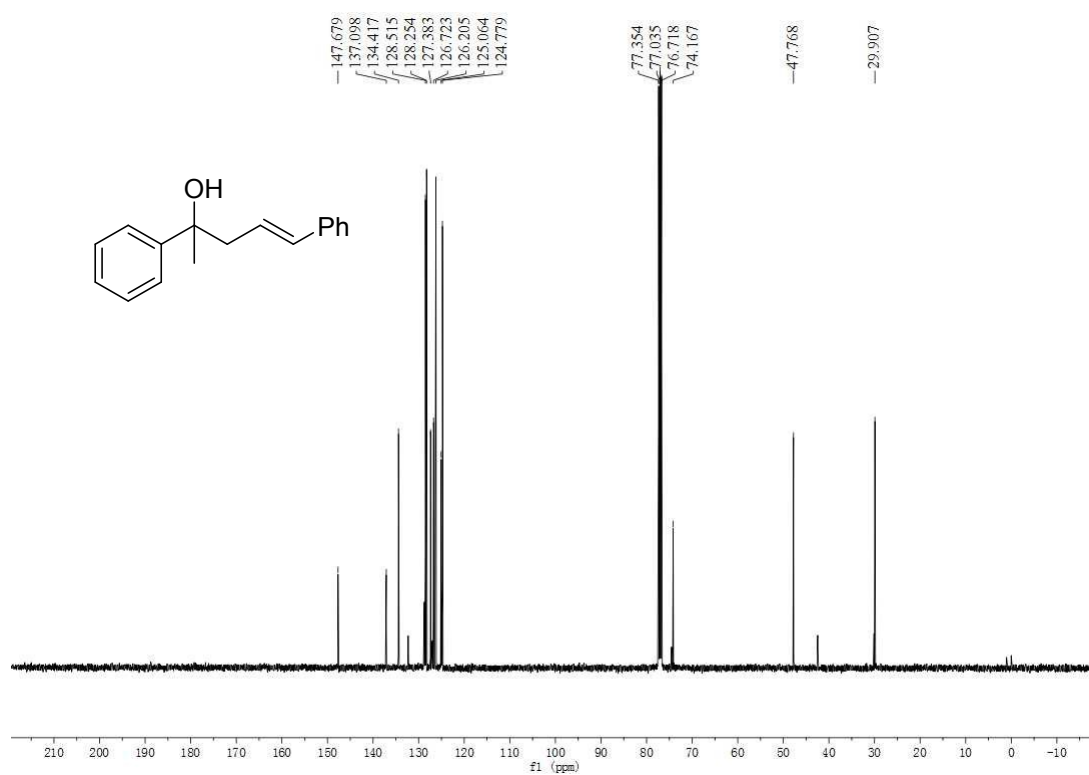

<sup>13</sup>C NMR Spectrum (100 MHz, CDCl<sub>3</sub>) of Compound 2m

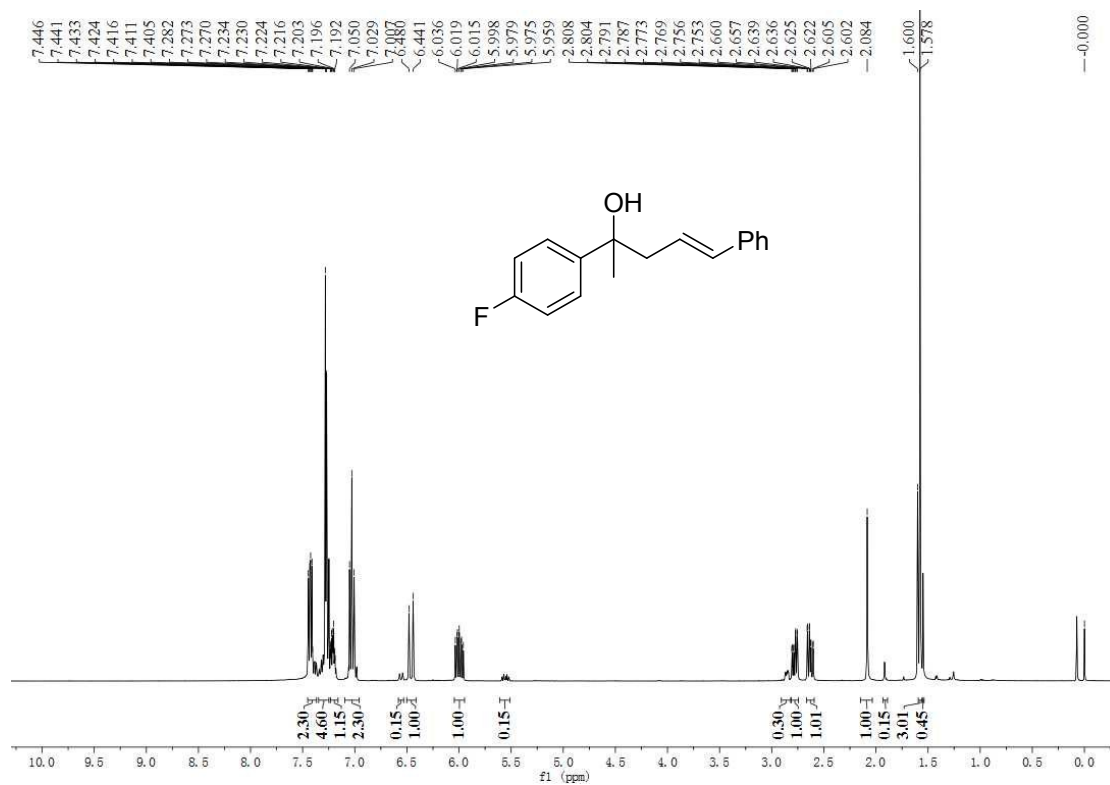

**<sup>1</sup>H NMR Spectrum (400 MHz, CDCl<sub>3</sub>) of Compound 2n**

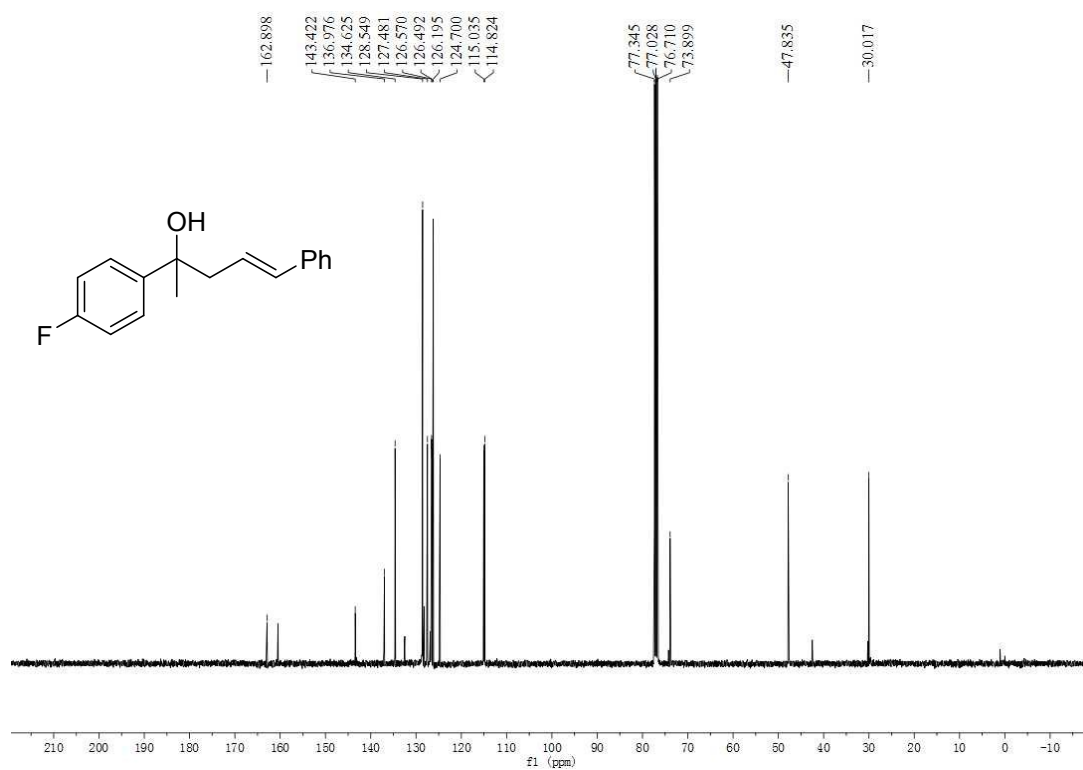

**<sup>13</sup>C NMR Spectrum (100 MHz, CDCl<sub>3</sub>) of Compound 2n**

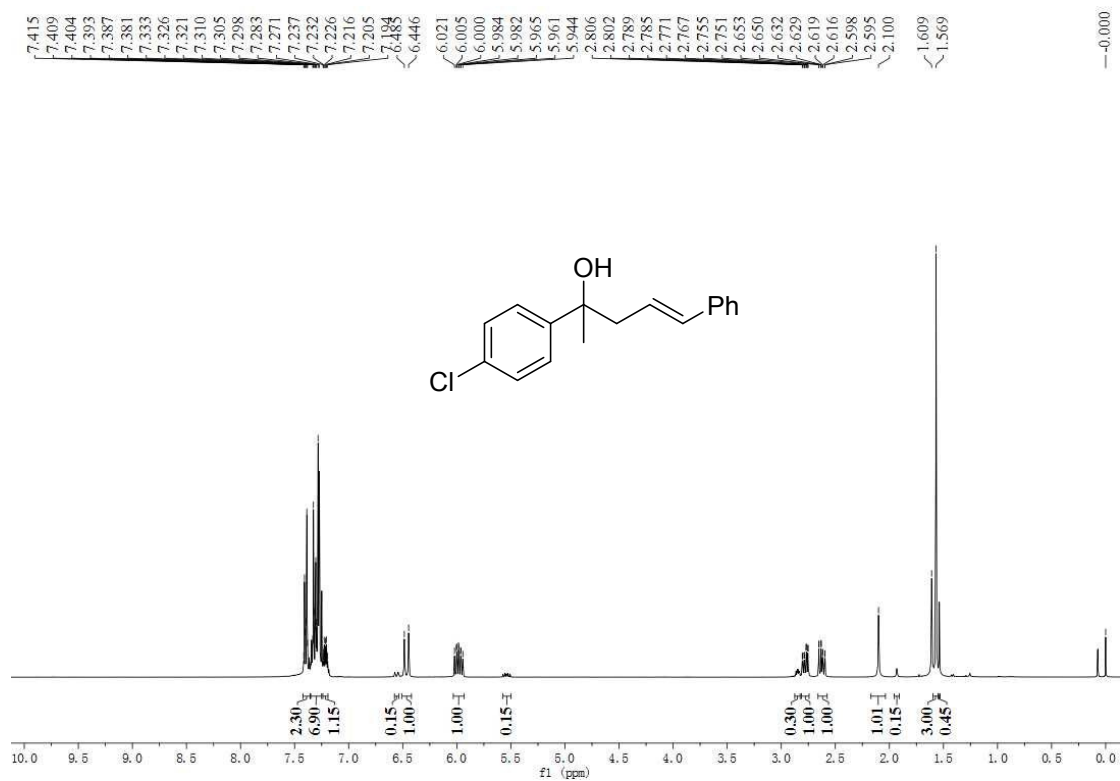

<sup>1</sup>H NMR Spectrum (400 MHz, CDCl<sub>3</sub>) of Compound **2o**

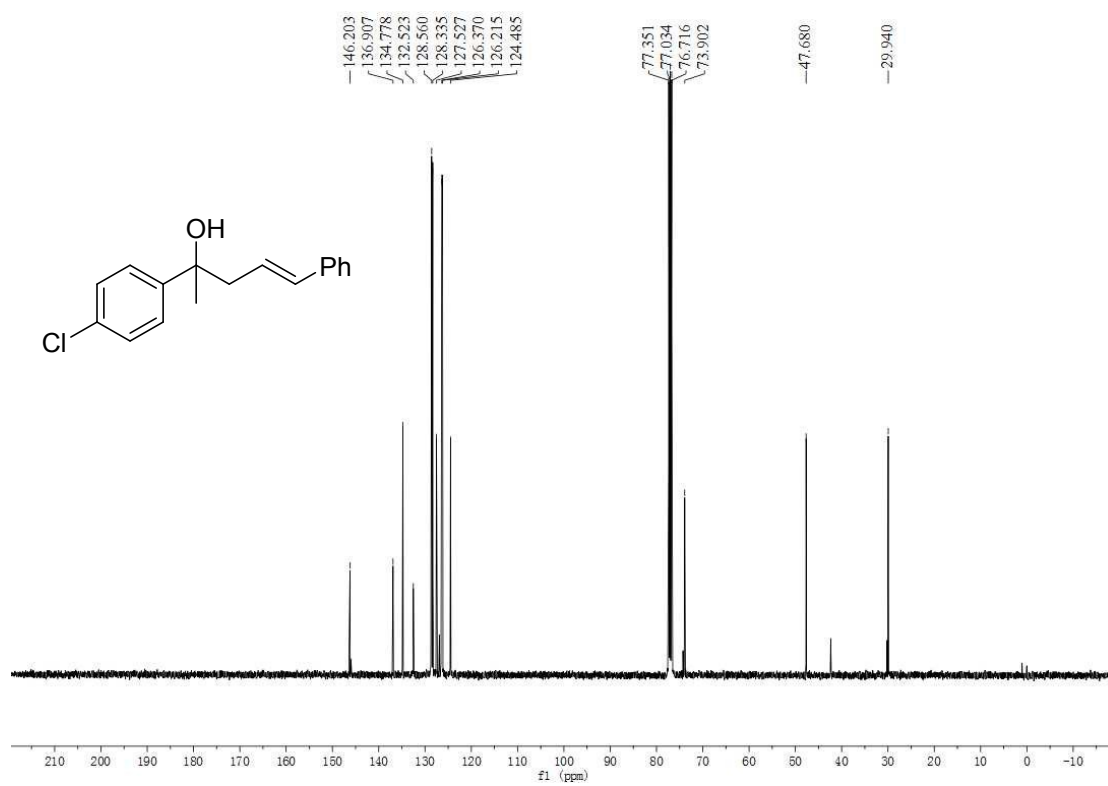

<sup>13</sup>C NMR Spectrum (100 MHz, CDCl<sub>3</sub>) of Compound **2o**



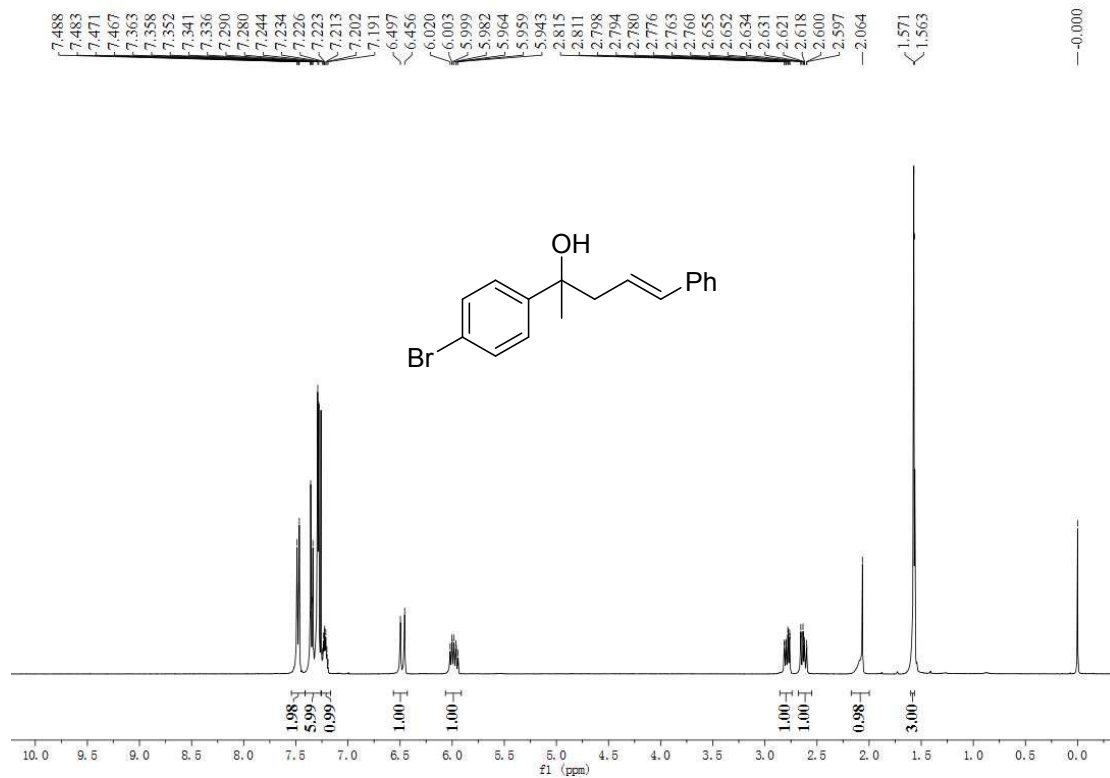

**<sup>1</sup>H NMR Spectrum (400 MHz, CDCl<sub>3</sub>) of Compound **2p****

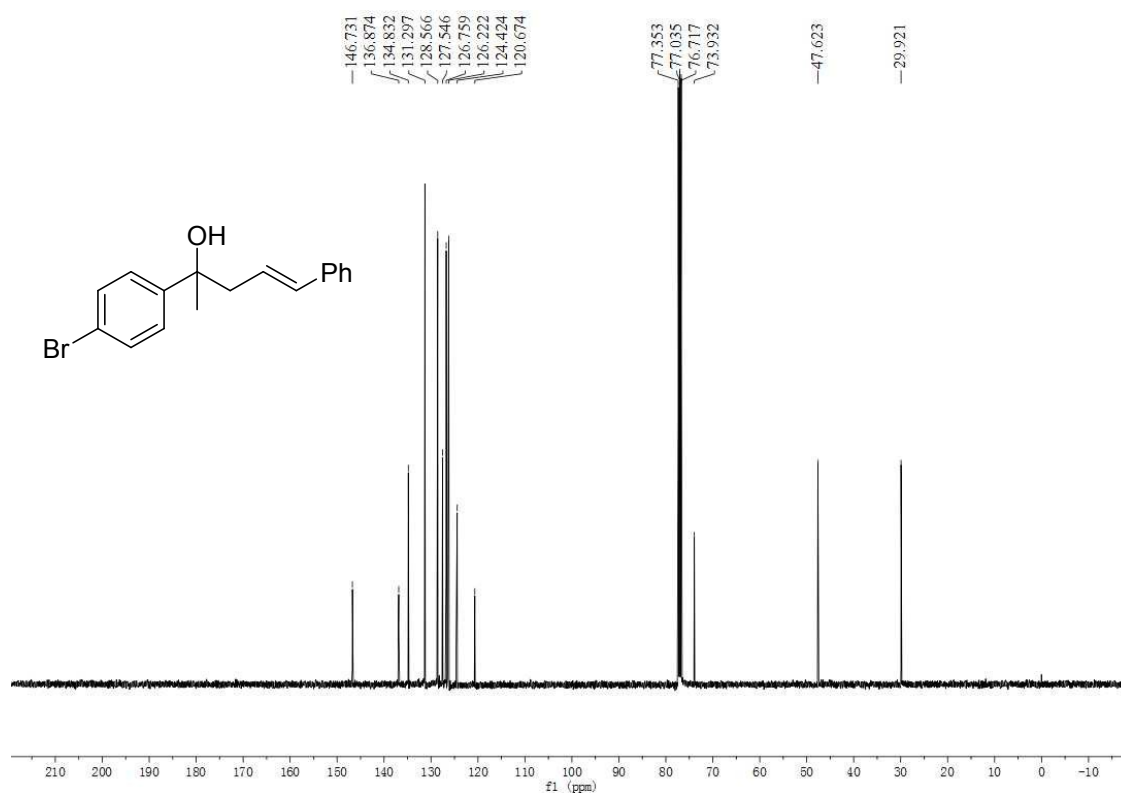

**<sup>13</sup>C NMR Spectrum (100 MHz, CDCl<sub>3</sub>) of Compound **2p****

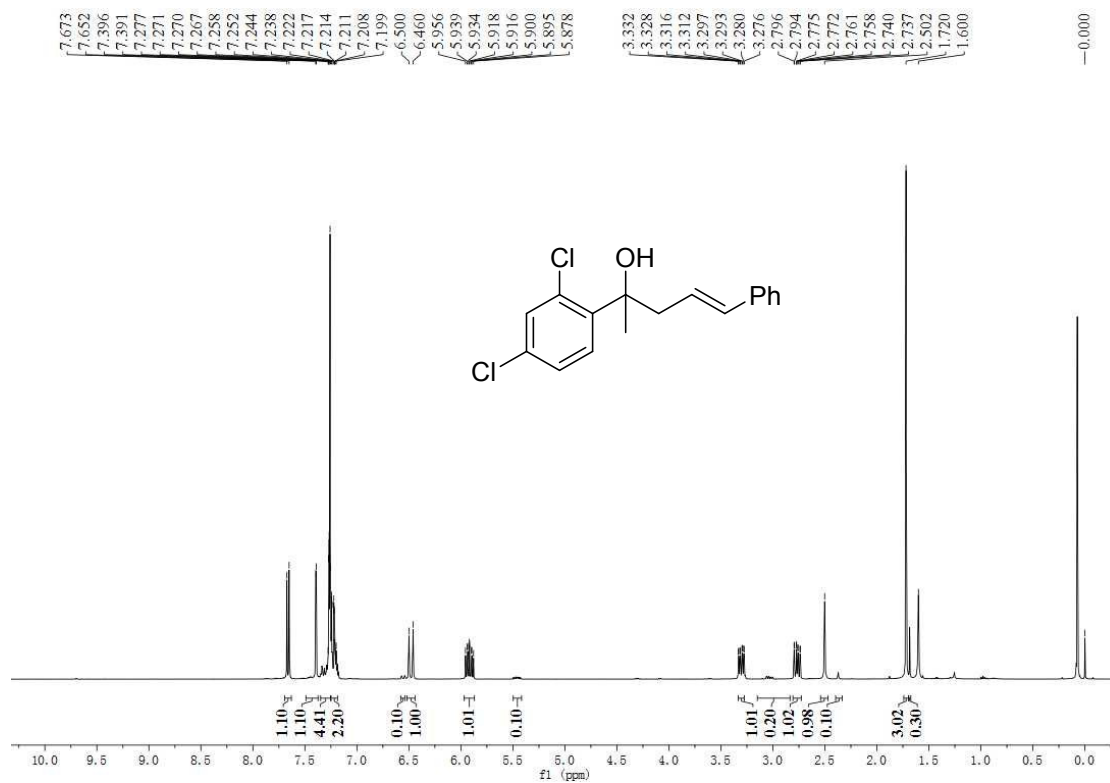

<sup>1</sup>H NMR Spectrum (400 MHz, CDCl<sub>3</sub>) of Compound **2q**

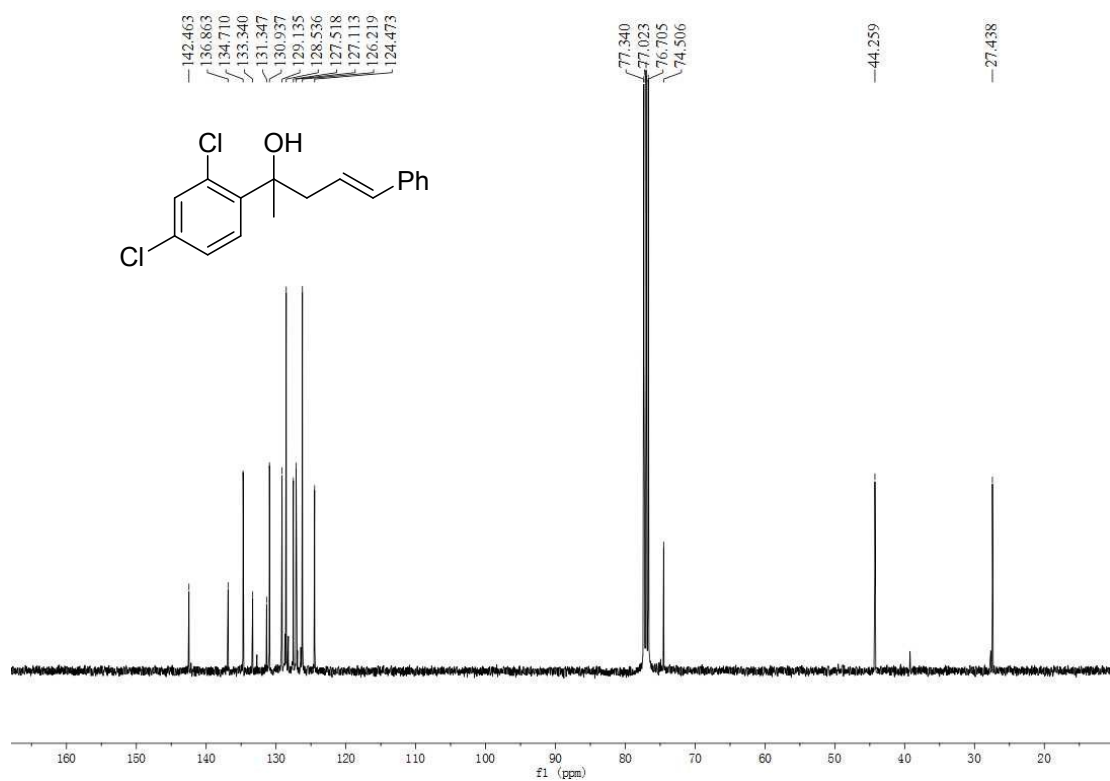

<sup>13</sup>C NMR Spectrum (100 MHz, CDCl<sub>3</sub>) of Compound **2q**

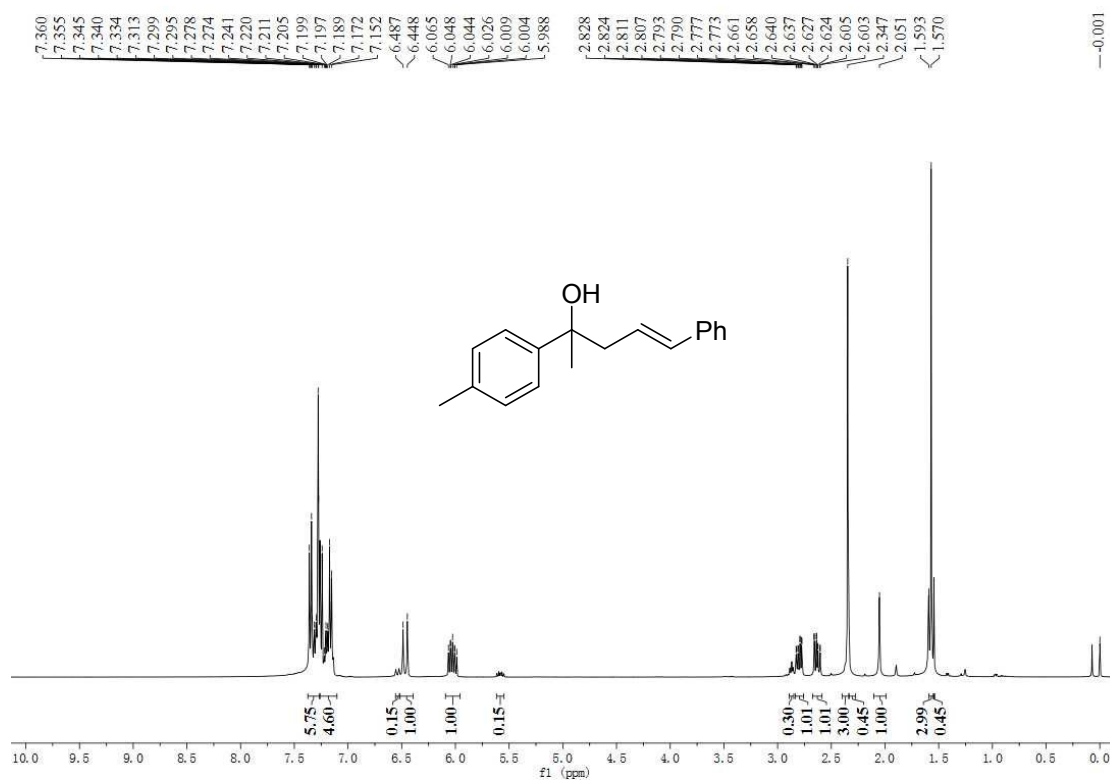

<sup>1</sup>H NMR Spectrum (400 MHz, CDCl<sub>3</sub>) of Compound 2r

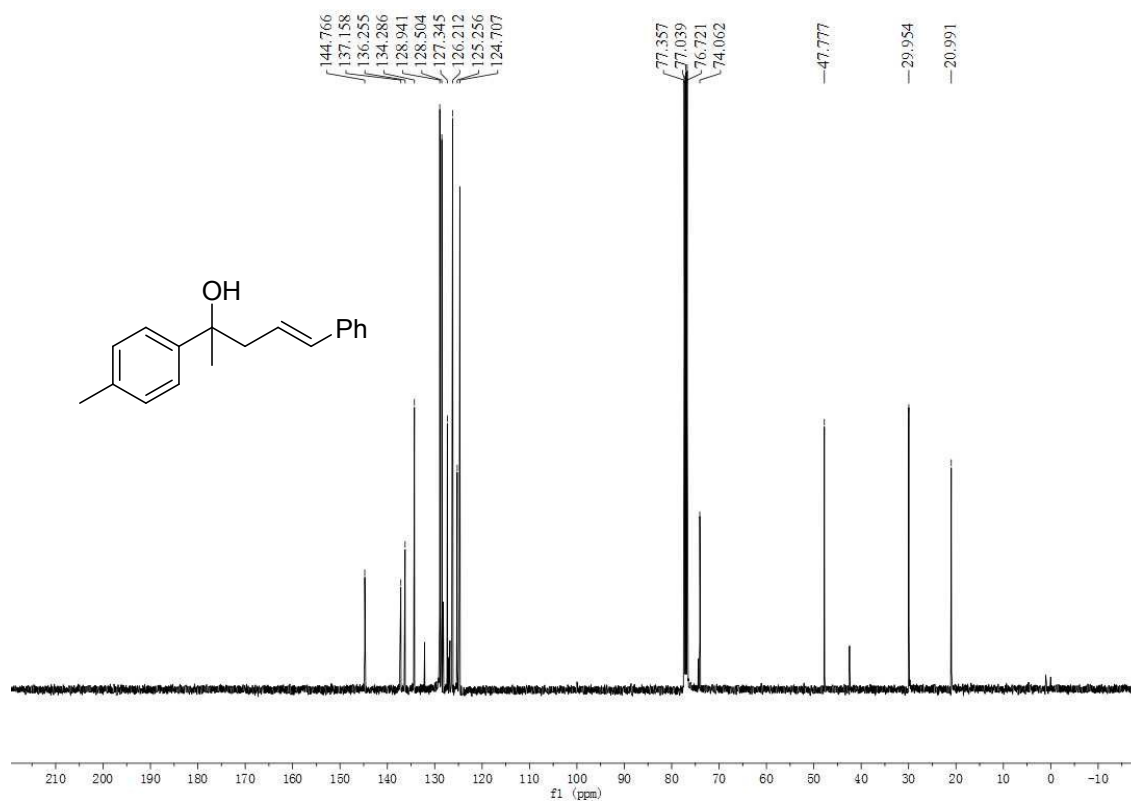

<sup>13</sup>C NMR Spectrum (100 MHz, CDCl<sub>3</sub>) of Compound 2r

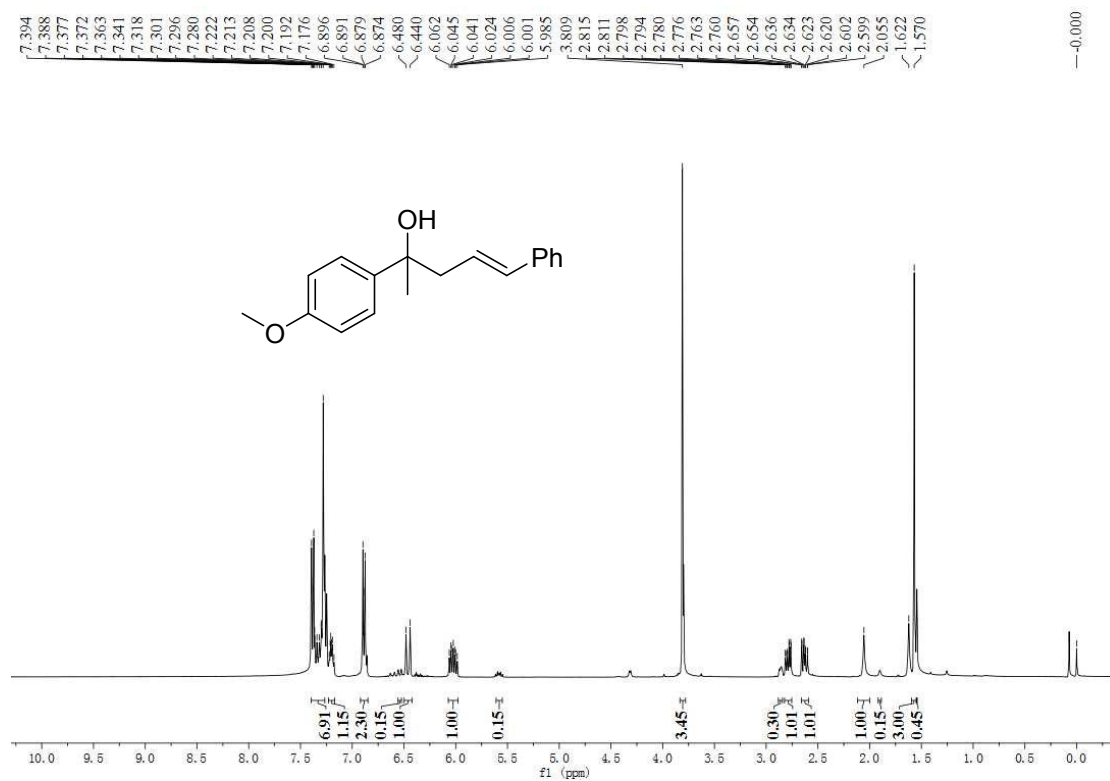

<sup>1</sup>H NMR Spectrum (400 MHz, CDCl<sub>3</sub>) of Compound 2s

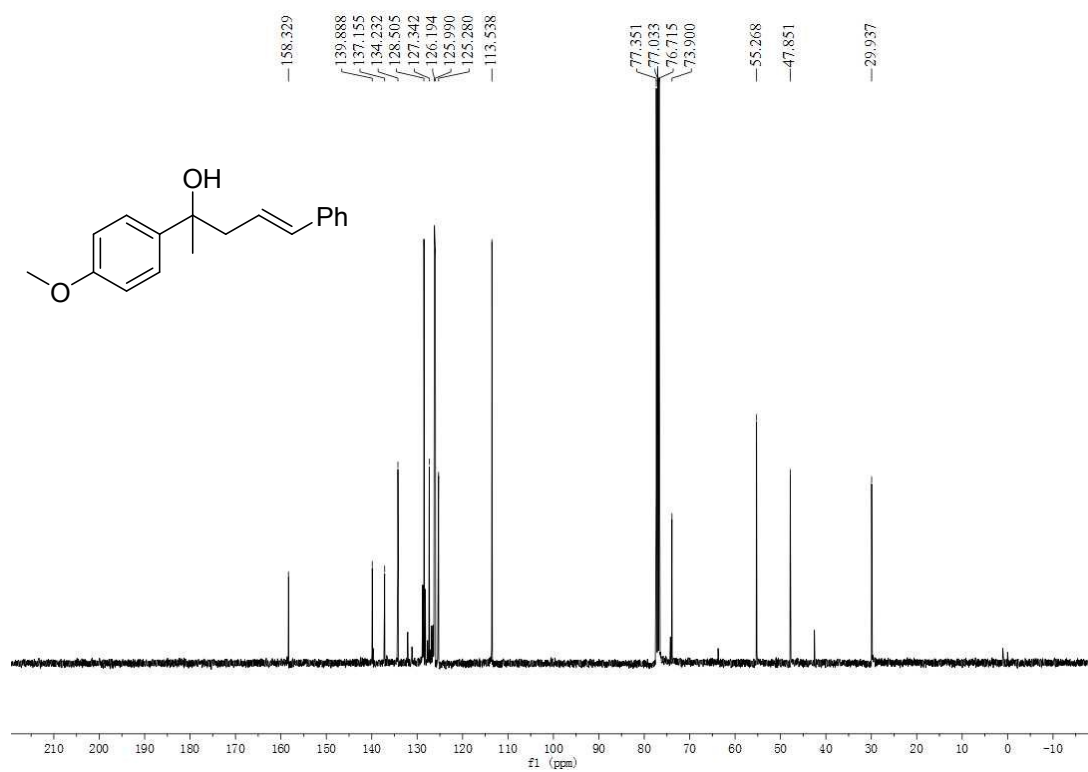

<sup>13</sup>C NMR Spectrum (100 MHz, CDCl<sub>3</sub>) of Compound 2s

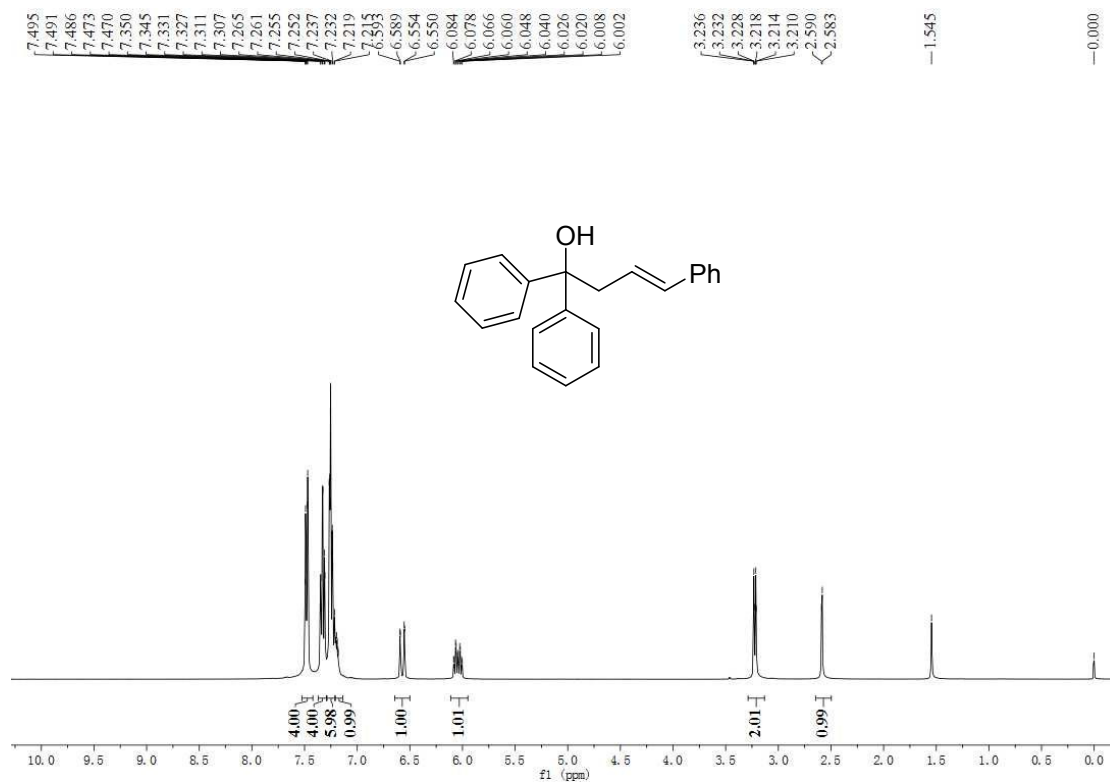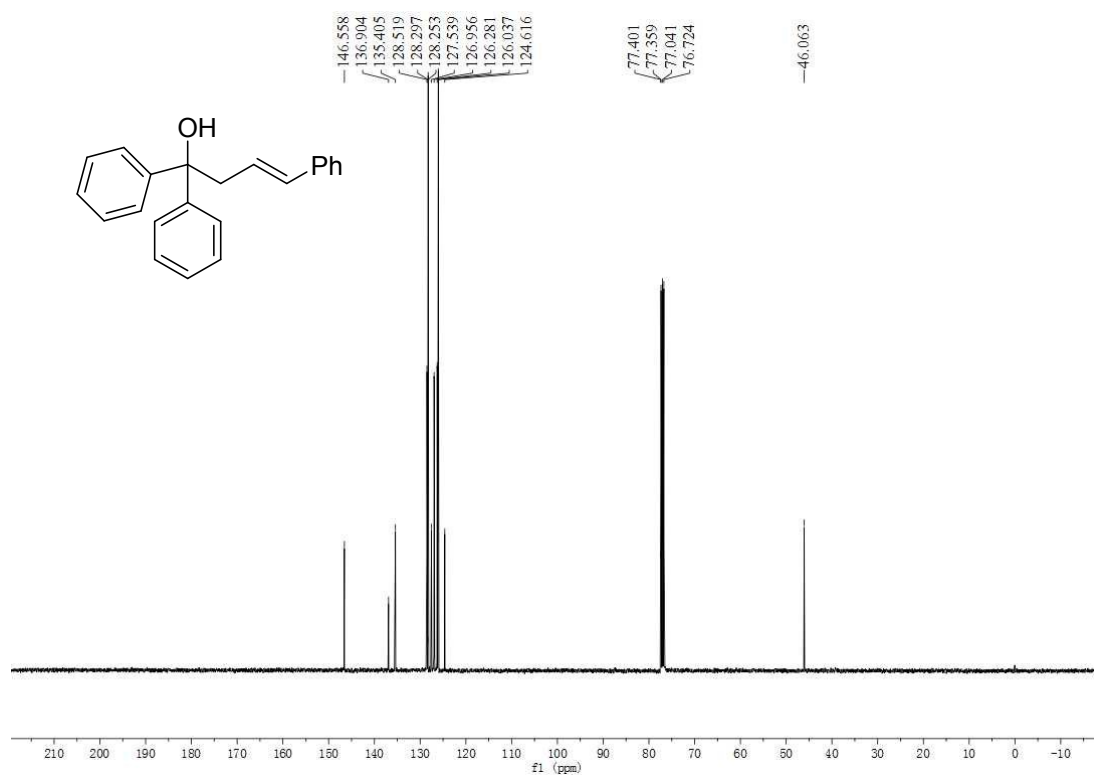

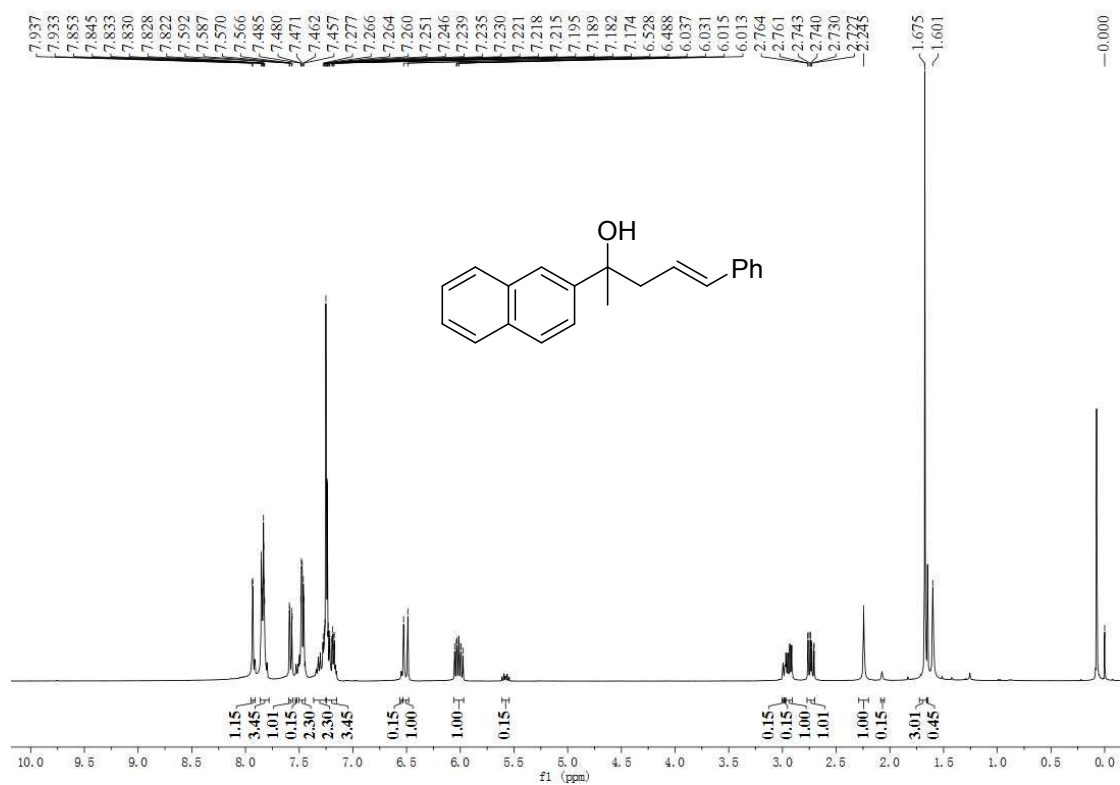

**<sup>1</sup>H NMR Spectrum (400 MHz, CDCl<sub>3</sub>) of Compound **2u****

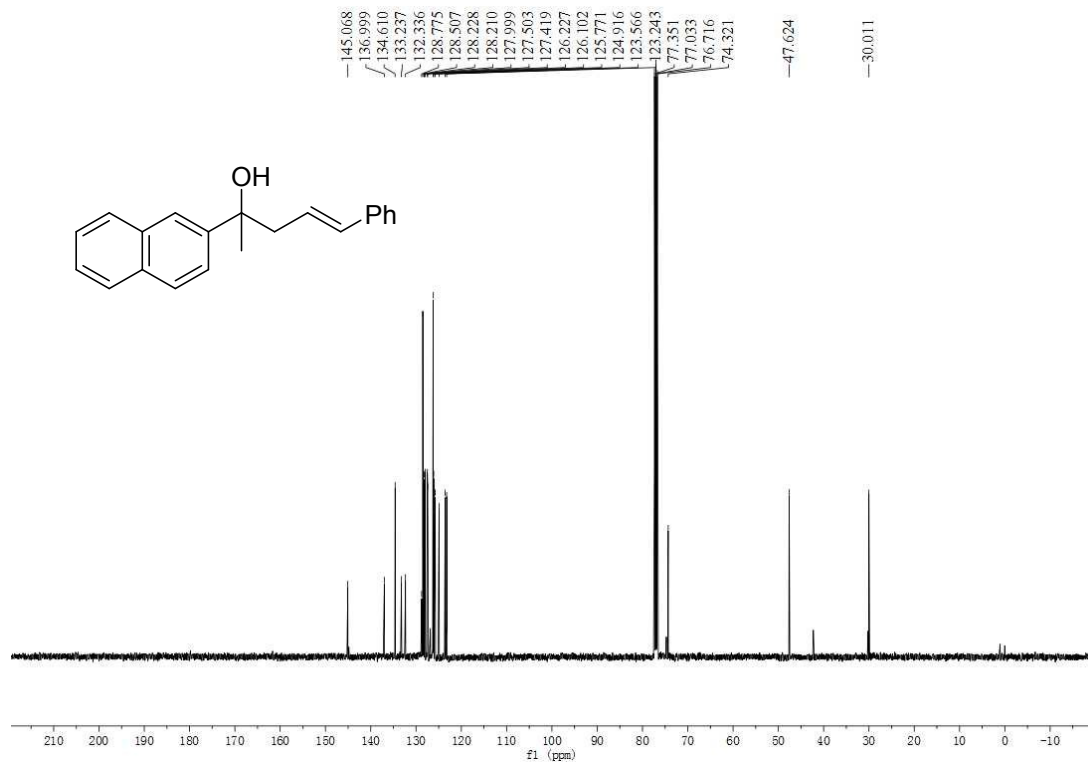

**<sup>13</sup>C NMR Spectrum (100 MHz, CDCl<sub>3</sub>) of Compound **2u****

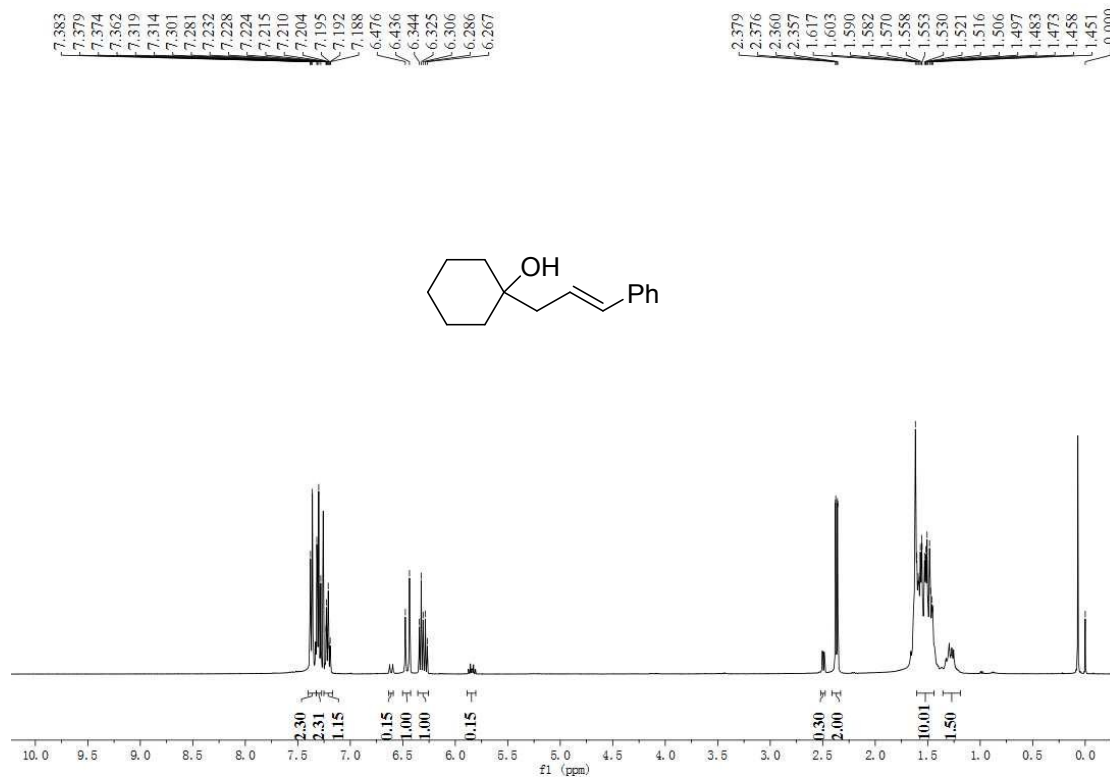

<sup>1</sup>H NMR Spectrum (400 MHz, CDCl<sub>3</sub>) of Compound 2v

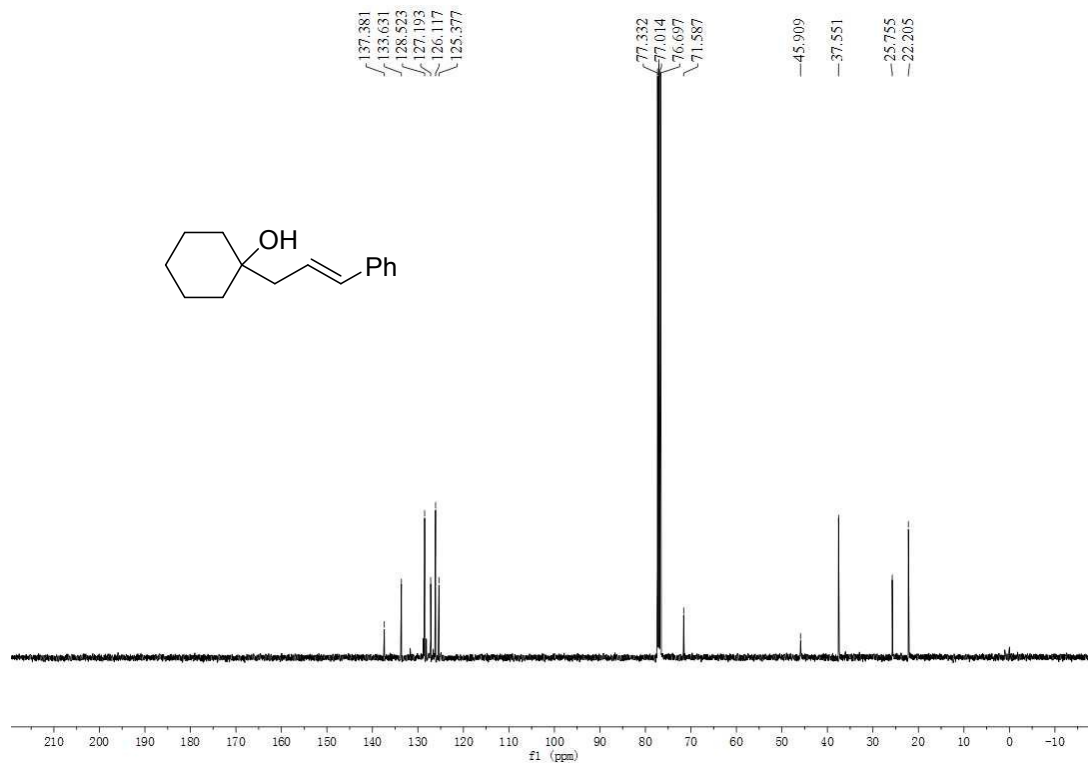

<sup>13</sup>C NMR Spectrum (100 MHz, CDCl<sub>3</sub>) of Compound 2v

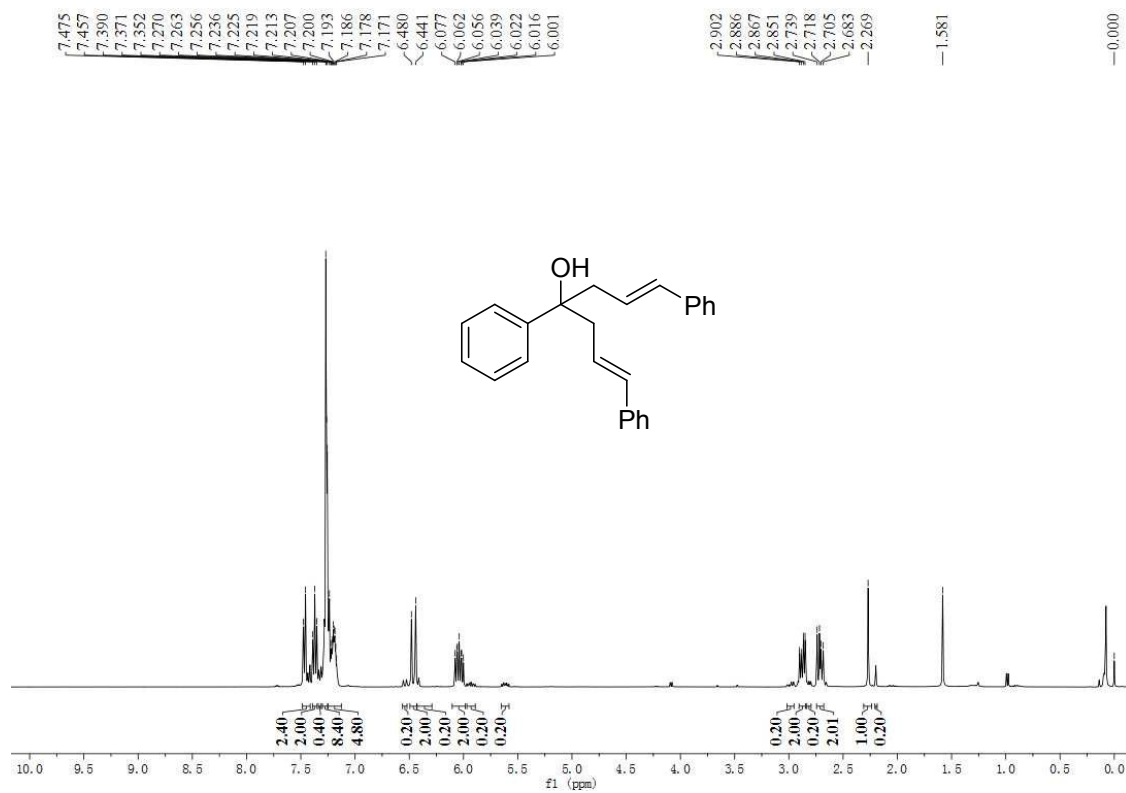

<sup>1</sup>H NMR Spectrum (400 MHz, CDCl<sub>3</sub>) of Compound 5a

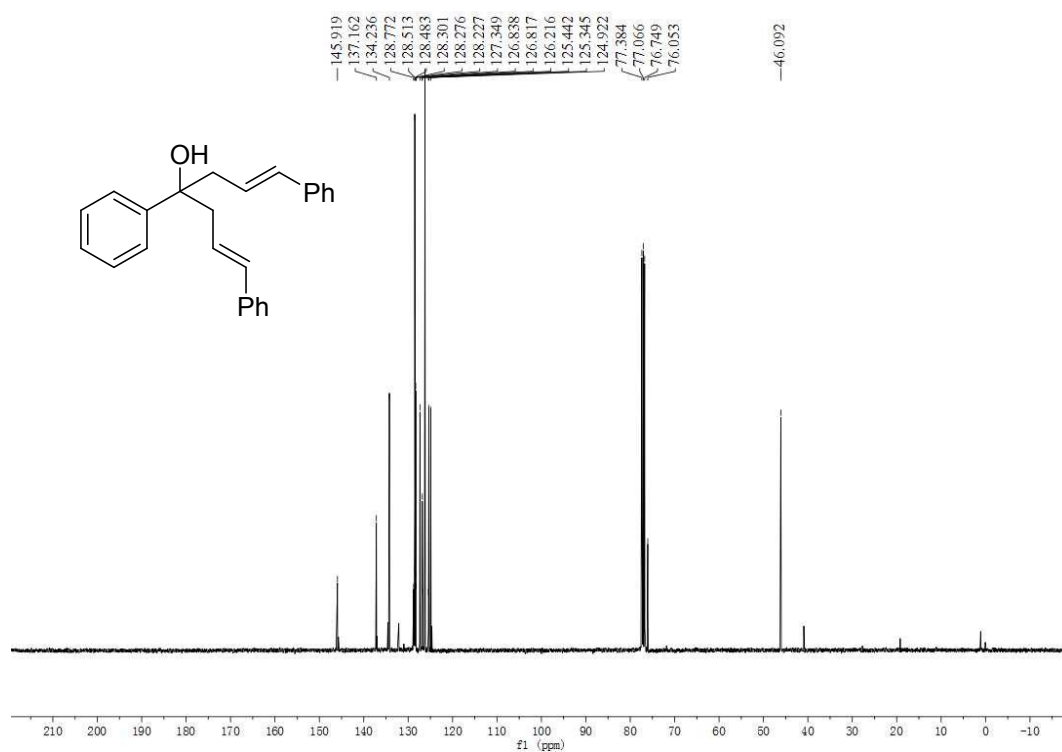

<sup>13</sup>C NMR Spectrum (100 MHz, CDCl<sub>3</sub>) of Compound 5a



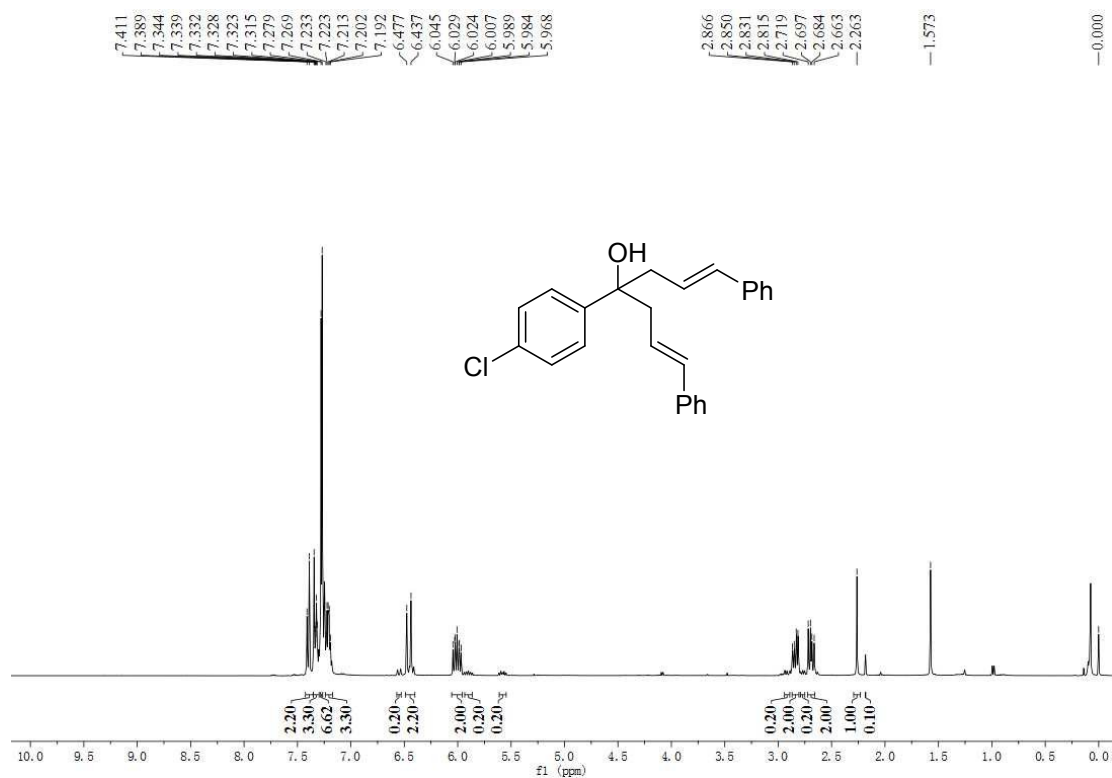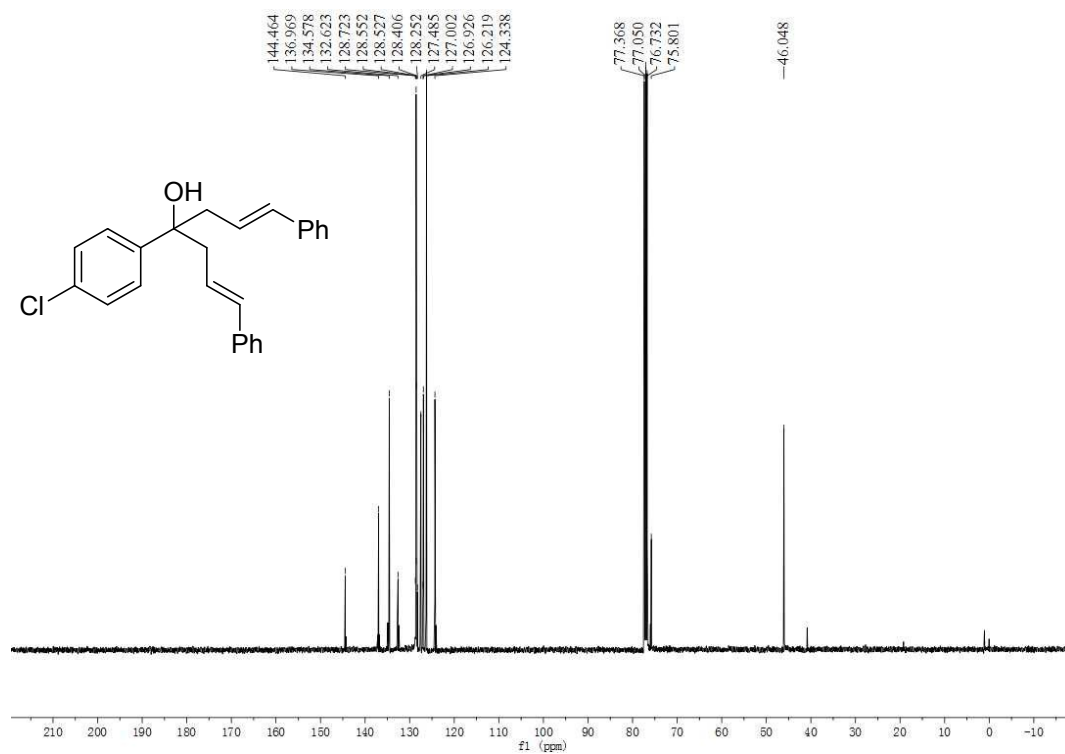

<sup>13</sup>C NMR Spectrum (100 MHz, CDCl<sub>3</sub>) of Compound **5b**

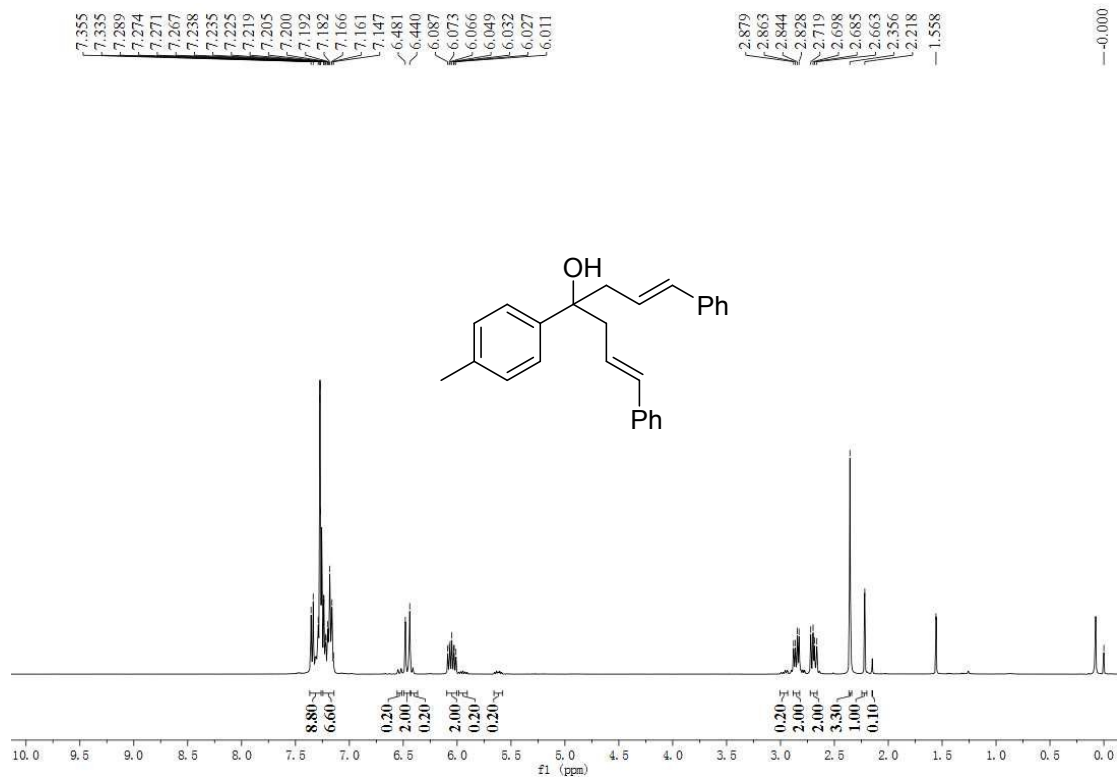

<sup>1</sup>H NMR Spectrum (400 MHz, CDCl<sub>3</sub>) of Compound 5c

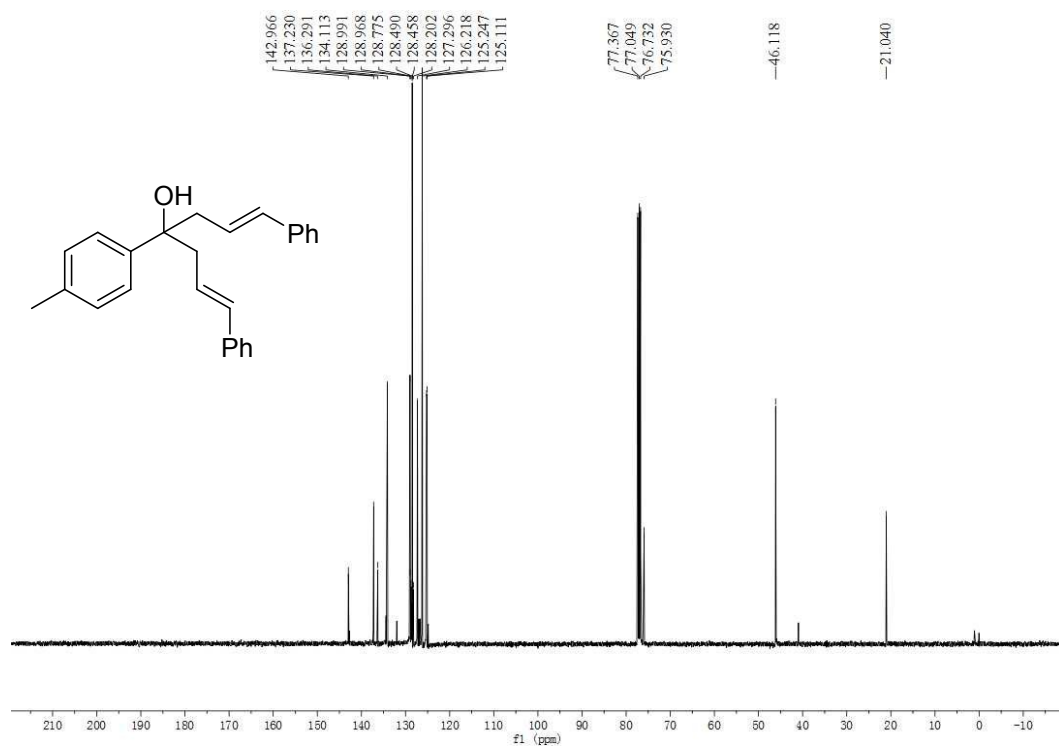

<sup>13</sup>C NMR Spectrum (100 MHz, CDCl<sub>3</sub>) of Compound 5c

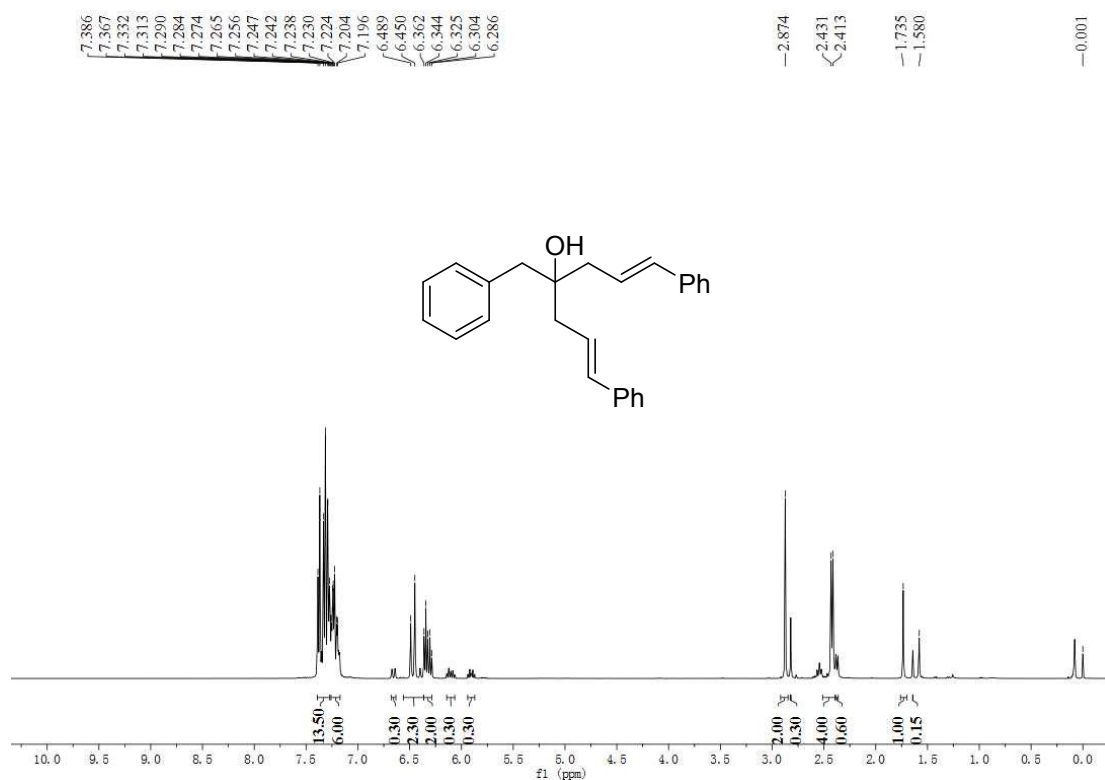

**<sup>1</sup>H NMR Spectrum (400 MHz, CDCl<sub>3</sub>) of Compound **5d****

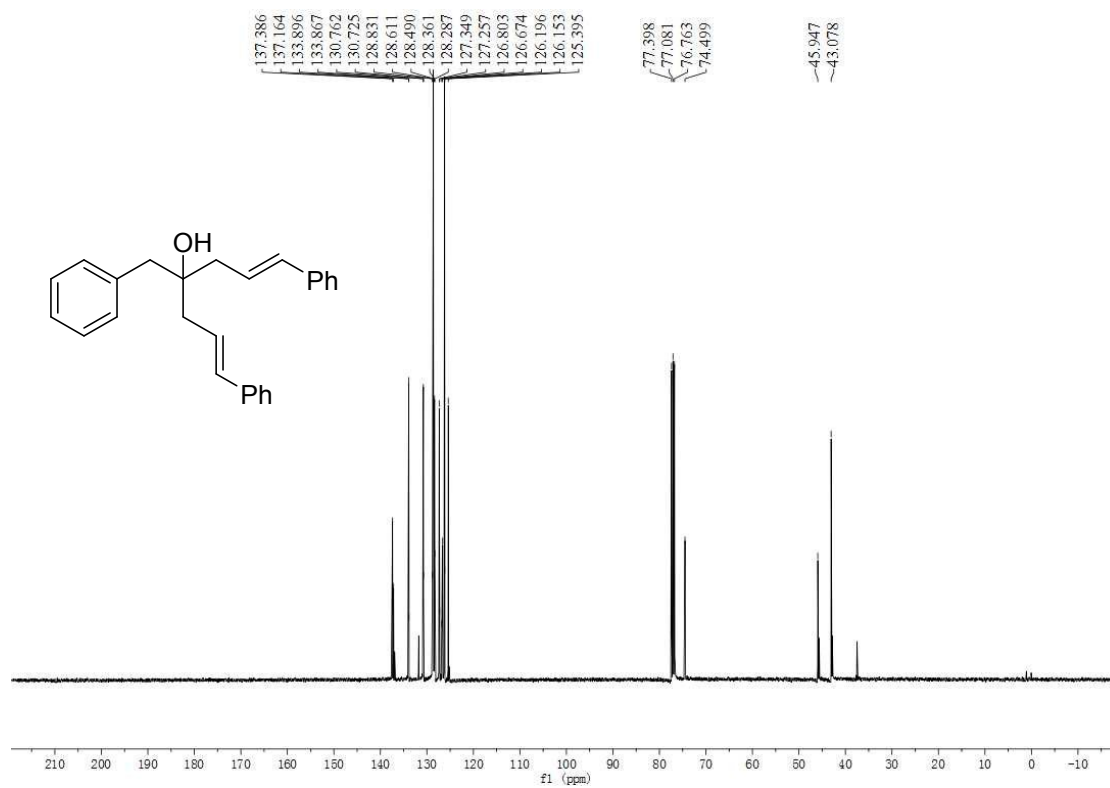

**<sup>13</sup>C NMR Spectrum (100 MHz, CDCl<sub>3</sub>) of Compound **5d****

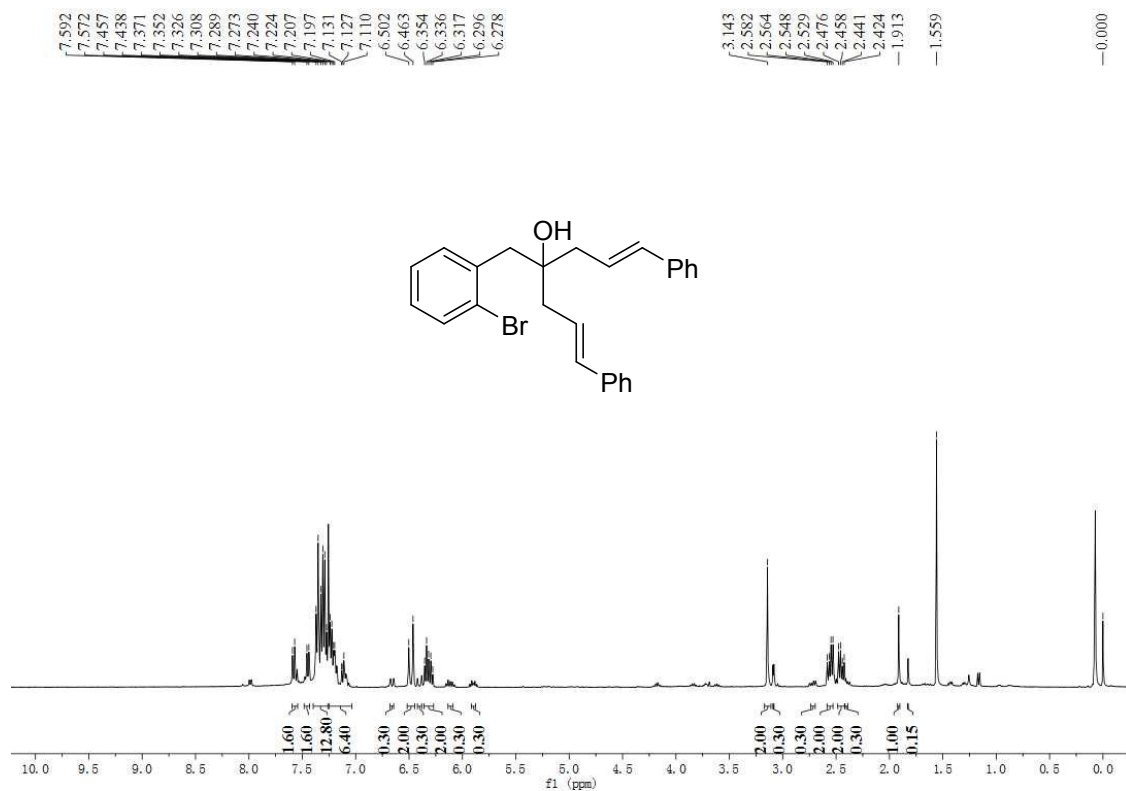

<sup>1</sup>H NMR Spectrum (400 MHz, CDCl<sub>3</sub>) of Compound **5e**

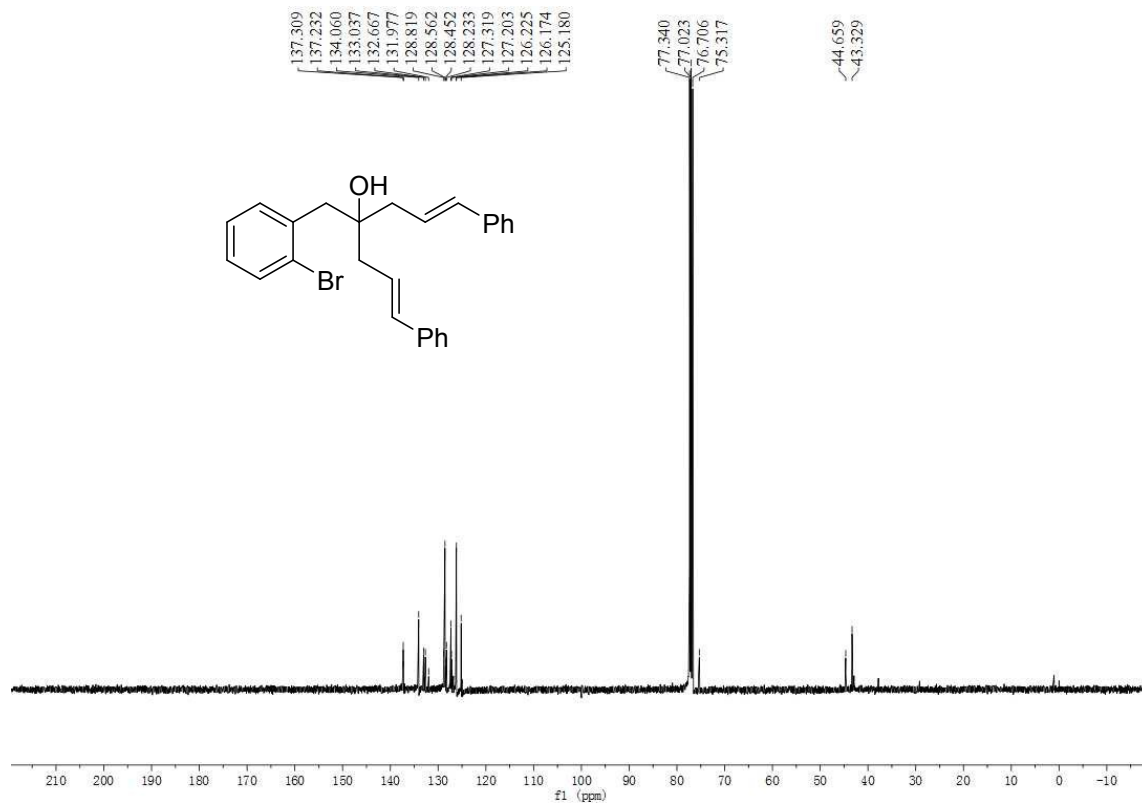

<sup>13</sup>C NMR Spectrum (100 MHz, CDCl<sub>3</sub>) of Compound **5e**

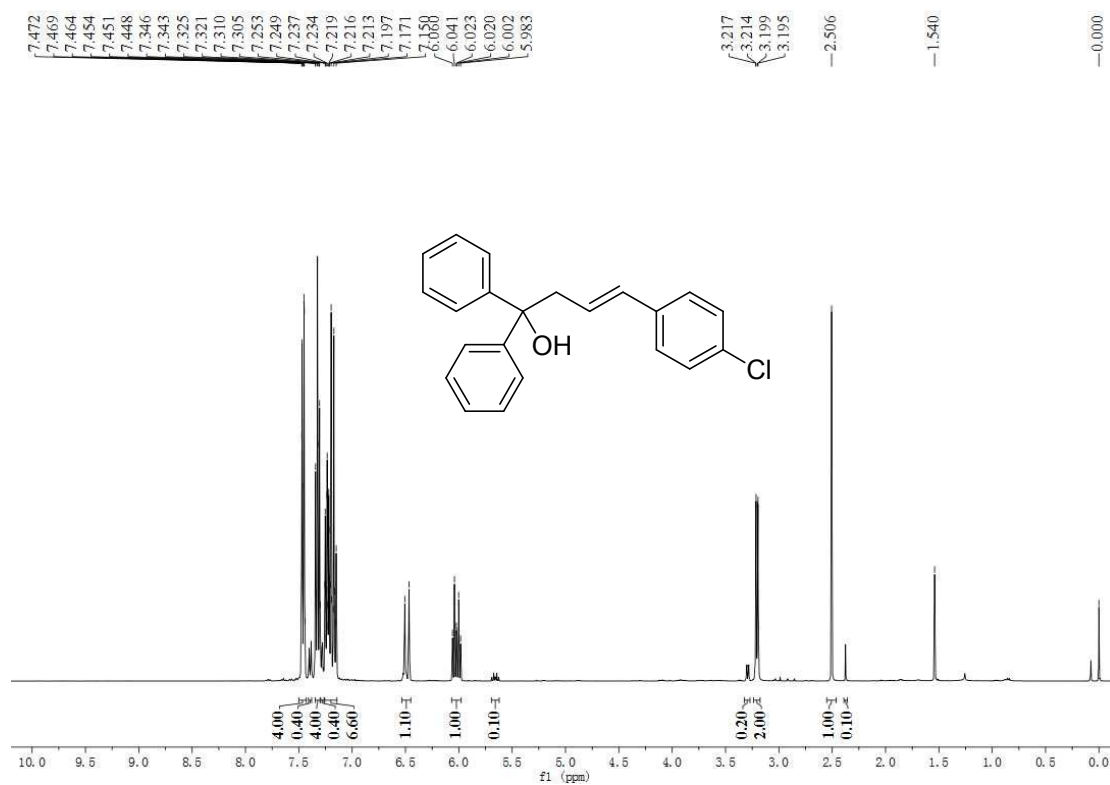

<sup>1</sup>H NMR Spectrum (400 MHz, CDCl<sub>3</sub>) of Compound 7

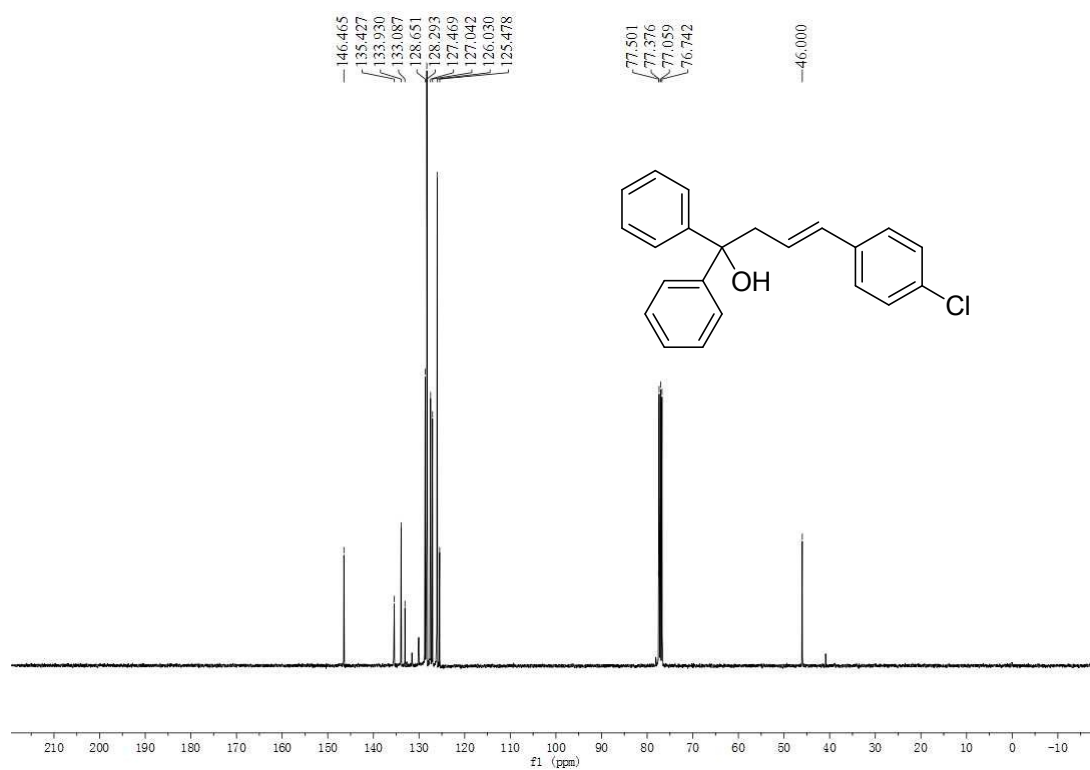

<sup>13</sup>C NMR Spectrum (100 MHz, CDCl<sub>3</sub>) of Compound 7
